# Supplementary material for: Revisiting N2 fixation in Guerrero Negro intertidal microbial mats with a functional single-cell approach
Source: PubMed Central journal article supplement — ISME J. 2014 Oct 10;9(2):485–96. doi: 10.1038/ismej.2014.144 (PMC4303640; doi:10.1038/ismej.2014.144), 2014-10-10
Supplement: ismej2014144x1.pdf [file ismej2014144x1.pdf]

# 1 **Supplementary Information**

## 2 **Supplementary Materials and Methods**

### 3 **Acetylene reduction assays**

4 Nitrogenase activity was measured with the acetylene reduction assay (ARA) as  
5 previously described (Bebout *et al.* 1993). Mat cores (10 mm diameter, 5 mm thick, including  
6 a dark sediment layer, see Supplementary Figure 2) were sampled in triplicate from mat slabs  
7 every 3 hours and placed into serum bottles (total volume 38 ml) containing 20 ml of  
8 seawater. The serum bottles were capped with gas-tight rubber stoppers, and 5 ml of the 18-  
9 ml headspace was exchanged for acetylene that was injected through the stopper into the  
10 aqueous phase to start the incubation. Mat cores were incubated with acetylene for 3 hours.  
11 Triplicate water samples without mat cores served as negative controls. Ethylene was  
12 quantified in a Shimadzu GC-14A gas chromatograph as described previously (Bebout *et al.*  
13 1993). Rates presented are means of three replicates  $\pm$  standard deviation.

### 14 **$^{15}\text{N}_2$ incubations**

15 For  $^{15}\text{N}_2$  incubation experiments, mat cores (10 mm diameter, 5 mm thick,  
16 Supplementary Figure 2) were transferred to a 14 ml serum vial, covered with 1 ml of *in situ*  
17 water and capped with gas-tight rubber stoppers. The headspace was exchanged with a  
18 mixture of 78%  $^{15}\text{N}_2$  gas ( $>98$  at%  $^{15}\text{N}$ ; Cambridge Isotope Laboratories, Andover, MA,  
19 USA), 21%  $\text{O}_2$  and 0.038%  $\text{CO}_2$ . Mats were incubated in triplicate in the dark for 10 hours,  
20 and subsequently, half of the mat cores were sectioned for bulk isotope analysis in two depth  
21 intervals (0 to 2 mm and 2 to 4 mm). The other half of the sectioned cores were preserved for  
22 NanoSIMS analysis by fixation in 4% paraformaldehyde (PFA) as previously described  
23 (Amann *et al.*, 1990). Mat cores incubated in air (without  $^{15}\text{N}_2$ ) were treated equally and  
24 served as controls.

### 25 **DNA and RNA Extraction**

26  
27 RNA and DNA were co-extracted from the uppermost 2 mm of three to four pooled  
28 mat cores by combining phenol-chloroform extraction with parts of the RNeasyMini and  
29 QIAamp DNA Mini Kit (QIAGEN, Valencia, CA, USA), respectively. For each core (10 mm  
30 diameter, upper 2 mm), biomass was transferred to a tube containing 0.5 ml RLT<sup>TM</sup> buffer  
31 and homogenized using a rotor-stator homogenizer (Omni International, Kennesaw, GA,  
32 USA). The suspension was bead-beated (BioSpec Products, Bartlesville, OK, USA) with  
33 zirconium beads (200  $\mu\text{m}$ , OPS Diagnostics, Lebanon, USA) and centrifuged at 8,000  $\times$  g for  
34 1 minute. Supernatants from the four mat cores were pooled and split into two aliquots; one  
35 for RNA and the other for DNA extraction. Each aliquot was extracted with phenol-  
36 chloroform-isoamyl alcohol (125:24:1, pH 4.5 for RNA and 25:24:1, pH 8.0 for DNA  
37 extraction) and the aqueous phase was further purified following the manufacturers'  
38 protocols. For the RNA samples, the aqueous phase was run through the gDNA eliminator  
39 spin column (QIAGEN) to remove genomic DNA and further treated with TURBO DNase<sup>TM</sup>  
40 (Applied Biosystems/Ambion, Austin, TX, USA). Isolated RNA was reverse transcribed into  
41 single-stranded cDNA using the SuperScript<sup>®</sup> III First-Strand Synthesis System (Invitrogen,  
42 Carlsbad, CA, USA).

### 43 **Amplification and sequencing of 16S rRNA and *nifH* genes and transcripts**

44  
45 For construction of 454 pyrotag amplicon libraries, the V6-V8 region of the 16S  
46 rRNA (from the cDNA) and 16S rRNA genes (from DNA) was PCR amplified using the  
47 universal primers 926F (Lane, 1991) and 1392R (Lane *et al.*, 1985). The reverse primer  
48 included the adaptor sequence and a five-base barcode. Sequences were generated at the  
49

50 Research and Testing Laboratory (Lubbock, Texas, USA) using the GS FLX Titanium Series  
51 Reagents (454 Life Sciences, Branford, CT, USA).

52 16S rRNA and 16S rRNA gene clone libraries of two biological replicates were  
53 constructed from single-stranded cDNA and DNA, respectively, by amplification with the  
54 broadly inclusive bacterial primers 27F and 1391R (Lane, 1991).

55 The *nifH* genes were PCR amplified from DNA and cDNA with a nested PCR  
56 protocol (Zehr and Turner, 2001). The primer sites were described as being conserved  
57 throughout *nifH* genes in clusters I, II, III and IV. The first PCR was conducted with primers  
58 nifH4 and nifH3, followed by a second PCR reaction with primers nifH1 and nifH2. The  
59 final PCR products were approximately 359 bp in length. Mat samples treated with DCMU  
60 during the diel cycle study failed to produce any detectable PCR product from cDNA with  
61 *nifH*-targeting primers (tested in two replicate RNA extractions). To test for potential  
62 inhibition of cDNA synthesis or PCR caused by residual amount of DCMU, we conducted  
63 general 16S rRNA PCR with the cDNA template and *nifH*-specific PCRs with co-extracted  
64 DNA samples. These reactions resulted in PCR products, indicating that residual amounts of  
65 DCMU did not inhibit cDNA synthesis or PCR, and therefore were not the cause for the  
66 failed PCR amplifications of *nifH* transcripts from DCMU-treated mat cDNA. We conclude  
67 that the level of *nifH* transcripts in DCMU treated samples was below the detection limit for  
68 successful PCR amplification.

69 For both, 16S rRNA and *nifH* libraries, PCR products of five replicate PCR reactions  
70 were pooled and purified using the Qiagen Min Elute PCR Purification Kit (Qiagen). Purified  
71 PCR amplicons were cloned using the TOPO TA Cloning Kit for sequencing (Invitrogen)  
72 according to the manufacturer's protocol. Clones were screened for inserts, and positive  
73 clones were sequenced by Beckman Coulter Genomics, Inc. (Danvers, MA, USA) with the  
74 primer M13F.

75

## 76 **Sequence analysis**

77 The replicate 16S rRNA and 16S rRNA gene 454 pyrotag amplicon libraries were  
78 processed individually (sorting, trimming, removing reads of low quality and classification)  
79 using the RDP pipeline with standard settings (<http://pyro.cme.msu.edu>) (Supplementary  
80 Table 1). Reads were taxonomically assigned using the RDP Classifier (Wang *et al.*, 2007).  
81 Sequencing resulted in 20,616 and 15,524 reads from both DNA templates and 20,138 and  
82 22,246 reads from both cDNA templates.

83 16S rRNA and 16S rRNA gene clone libraries of two biological replicates were  
84 constructed from single-stranded cDNA and DNA. In total, 520 sequences (of 600 to 700 bp  
85 length) were derived from DNA samples (D3= 256, and D5= 264 sequences) and 316  
86 sequences from cDNA samples (C3= 150, and C5= 166 sequences). Partial 16S rRNA and  
87 16S rRNA gene Sanger sequences of clone libraries were taxonomically assigned using the  
88 RDP Classifier. For phylogenetic analysis, sequences were aligned using the SILVA  
89 Incremental Aligner (SINA) (Pruesse *et al.* 2012) and imported in the ARB program (Ludwig  
90 *et al.* 2004). 16S rRNA gene and transcript sequences were sorted into two bins depending  
91 whether they represented the 3' or 5' end of the 16S rRNA (gene). The closest relatives of  
92 these sequences were retrieved in SILVA (Pruesse *et al.* 2007) (<http://www.arb-silva.de/>).  
93 Phylogenetic trees were calculated with nearly full-length reference sequences using  
94 maximum likelihood, maximum parsimony and neighbor joining algorithms, with and  
95 without a 50% position variability filter. The partial sequences determined in this study were  
96 added with the quick add parsimony function in ARB. Bootstrap values were calculated in  
97 Geneious 5.5.6 with the PhyML algorithm, using 100 bootstrap trees.

98 We retrieved a total of 313 *nifH* sequences from DNA, 522 sequences from cDNA and  
99 181 from cDNA of the molybdate inhibition experiment. *NifH* gene/transcript sequences

100 were quality checked in Geneious. Deduced amino acid sequences of the *nifH*  
101 genes/transcripts along with closest related *NifH* sequences collected from NCBI and  
102 reference sequences from the Zehr laboratory *nifH* database  
103 (<http://www.es.ucsc.edu/~wwwzehr/research/database>) were locally aligned in MUSCLE  
104 (Edgar 2004) and imported into the ARB program. Phylogenetic trees were constructed based  
105 on deduced amino acid sequences using maximum likelihood, maximum parsimony and  
106 neighbor joining algorithms. Bootstrap values were calculated as described above.  
107 Representative chlorophyllide reductase genes were included in the *NifH* database to detect  
108 sequences possibly related to those genes in the sample, but none of the newly derived  
109 sequences grouped with those genes.

110

### 111 **NanoSIMS analysis of Laguna Ojo de Liebre mat samples**

112 Mat samples of the upper 2 mm were transferred with tweezers onto 5 x 5  $\mu\text{m}$  silicon  
113 wafer pieces (Ted Pella, Redding, CA, USA), teased apart, attached by drying and  
114 subsequently washed in ultrapure water (MQ, Millipore). In experiments where catalyzed  
115 reporter deposition- fluorescence *in situ* hybridization (CARD-FISH) was combined with  
116 NanoSIMS analysis, wafers were coated with VectaBond (Vector Laboratories, Burlingame,  
117 CA, USA) prior to sample deposition. Samples were gold coated after light and fluorescence  
118 imaging and before scanning electron microscopy (SEM; FEI Inspect F, FEI, Hillsboro, OR,  
119 USA) and NanoSIMS imaging to mitigate sample charging and ease imaging.

120 Target cells were identified by comparing the NanoSIMS  $^{12}\text{C}^{14}\text{N}^-$  secondary ion and  
121 secondary electron images, the respective SEM image, and for *Deltaproteobacteria* the  
122 CARD-FISH image. Prior to data acquisition, analysis areas were pre-sputtered utilizing a  
123 high intensity  $\text{Cs}^+$  primary ion beam to ensure that the analyzed volumes were located within  
124 the cells. For small filamentous *Cyanobacteria*, typically 3–10 connected cells within a  
125 filament were analyzed collectively, thus yielding the average isotopic composition per  
126 filament. Due to the large size of the *Lyngbya* spp.-related *Cyanobacteria*, isotope  
127 enrichment measurements were done by accelerated sputtering utilizing high primary ion  
128 beam currents ( $\sim 1$  nA, 2  $\mu\text{m}$  beam size). Negative-control samples of *Deltaproteobacteria*  
129 and *Lyngbya* spp.-related *Cyanobacteria* with natural isotopic composition were analyzed for  
130 reference. Instrumental mass fractionation was less than 3%. Internal precision for individual  
131 cell measurements was approximately 1%.

132 Data were acquired as images by scanning a  $\sim 100$  nm diameter primary ion beam  
133 over areas between 10 x 10 and 50 x 50  $\mu\text{m}^2$ . Images were recorded as multilayer-stacks,  
134 each consisting of 5 to 15 individual cycles (i.e. layers). Secondary electrons were detected  
135 simultaneously to secondary ions to facilitate target cell identification. Individual images  
136 were corrected for detector dead-time and image drift from layer to layer prior to stack  
137 accumulation. Data were processed to generate quantitative isotope ratio images from ion  
138 images using custom software (LIMAGE, L. Nittler, Carnegie Institution of Washington).  
139 Regions of interest (ROIs), referring to individual cells, were manually defined based on the  
140  $^{12}\text{C}^{14}\text{N}^-$  secondary ion maps and cross-checked by the topographical/morphological  
141 appearance in secondary electron images. The isotopic composition for each ROI was  
142 determined by averaging over the individual images of the multilayer stack. Data are  
143 presented as isotope fractions given atomic percent [at%] as calculated from isotope ratios  
144 via: isotope fraction [at%] =  $R / (R + 1) * 100$ ,  
145 where R is the ratio of the relative amounts of the heavy and the light isotope, i.e.  $^{15}\text{N}$  and  
146  $^{14}\text{N}$ . Data refer to the arithmetic mean of all NanoSIMS measurements per cell type,  $\pm$   
147 standard error (SE) over the analyzed cells.

148

### 149 **Assessment of CARD-FISH effects on single-cell isotope composition**

150 The CARD-FISH procedure can have an effect on the isotopic composition ( $^{13}\text{C}/^{12}\text{C}$   
151 and  $^{15}\text{N}/^{14}\text{N}$ ) of cells, since cells will be exposed to reagents that contain C and N (such as  
152 lysozyme, hybridized DNA probes labeled with peroxidase, dextrane sulfate, blocking  
153 reagent) during lysozyme treatment, hybridization and amplification that will not be  
154 completely removed during the washing step. Deposition of fluorescently-labeled tyramides  
155 in the signal-amplification step further introduces C and N in the cells. Furthermore, if the  
156 assimilated isotopes are mainly present in small molecules or storage compounds, these  
157 might be preferentially lost (compared to other cellular material) during the CARD-FISH  
158 procedure. In order to evaluate the potential dilution effect of the CARD-FISH procedure, we  
159 applied CARD-FISH to isotopically labeled *Escherichia coli* (DSM 498) and *Bacillus subtilis*  
160 (DSM 8439) cells, examples of Gram-negative and -positive cells, respectively.

161  
162 *Bacterial strains, growth conditions and cell fixation.* *Escherichia coli* K12 (DSM 498) and  
163 *Bacillus subtilis* (DSM 8439) were used as model organisms in this study since they possess  
164 Gram-positive and Gram-negative cell walls, respectively. Different fixation methods are  
165 commonly applied in FISH (and CARD-FISH) of Gram-negative and Gram-positive bacteria  
166 (Roller *et al.* 1994). Therefore, we aimed at testing the CARD-FISH effect on cells with  
167 different cell wall structures in combination with their respective fixation methods, which  
168 could result in different loss (washout) of cell compounds and material deposition during the  
169 CARD-FISH procedure. Cells were grown in defined medium consisting of  $\text{Na}_2\text{HPO}_4$  (12.8 g  
170  $\text{l}^{-1}$ ),  $\text{KH}_2\text{PO}_4$  (3.0 g  $\text{l}^{-1}$ ),  $\text{NaCl}$  (0.5 g  $\text{l}^{-1}$ ), and  $\text{NH}_4\text{Cl}$  (1.0 g  $\text{l}^{-1}$ ). After autoclaving, 5 ml of a  
171 filter-sterilized solution containing D-glucose (2.0 g  $\text{l}^{-1}$ ),  $\text{MgSO}_4 \cdot 7\text{H}_2\text{O}$  (0.5 g  $\text{l}^{-1}$ ),  
172  $\text{CaCl}_2 \cdot 2\text{H}_2\text{O}$  (0.015 g  $\text{l}^{-1}$ ) and  $\text{FeSO}_4 \cdot 7\text{H}_2\text{O}$  (0.01 g  $\text{l}^{-1}$ ) and 1 ml of sterile selenite-tungsten  
173 solution (Widdel and Pfennig, 1981) were added. Experiments were performed with approx.  
174 6% and 99% stable isotope labeled D-glucose and ammonium chloride as the sole sources of  
175 carbon and nitrogen in this medium by using  $^{13}\text{C}$  D-glucose ( $^{13}\text{C}$ , 99%; Cambridge Isotope  
176 Laboratories, Inc., Tewksbury, MA, USA) and  $^{15}\text{N}$  ammonium chloride ( $^{15}\text{N}$ , 99%;  
177 Cambridge Isotope Laboratories, Inc.). The cultures were incubated overnight at 37°C with  
178 shaking at 200 rpm in 15 ml glass tubes filled with 5 ml of media. Two transfers of cells (50  
179  $\mu\text{l}$ ) to fresh media (5 ml) were carried out in order to ensure equal labeling of all cells.  
180 Finally, 5 ml of media were inoculated for a third time, and cell growth was monitored by  
181 measuring the optical density at 578 nm at every hour. Cells were harvested at an  $\text{OD}_{578}$  of  
182 0.6 in the exponential phase, washed twice with ice-cold 1 x phosphate buffered saline  
183 (1xPBS, 8.475 g  $\text{NaCl}$ , 1.093 g  $\text{Na}_2\text{HPO}_4$ , and 0.276 g  $\text{NaH}_2\text{PO}_4$   $\text{l}^{-1}$  in ultrapure water; pH  
184 7.4), and collected again by centrifugation (14000 x g, for 5 min at 4°C). *B. subtilis* cells  
185 were fixed by an ethanol-PBS mixture (50/50, 96% ethanol/1xPBS, vol/vol) for 2 h on ice. *E.*  
186 *coli* cells were fixed in 2% formaldehyde in 1xPBS for 3 h at 4°C, washed three times with  
187 ice-cold 1xPBS and resuspended in ethanol-PBS mixture (50/50, 96% ethanol/1xPBS,  
188 vol/vol). Fixed cells were stored at -20°C until further processing.

189 For NanoSIMS measurements, cells were immobilized onto boron-doped silicon  
190 wafers (7 × 7 × 0.5 mm), air-dried at 46°C for 5 min and rinsed with ultrapure water (MQ,  
191 Millipore). The CARD-FISH experiments were directly performed on these silicon wafers.

192  
193 *Oligonucleotide probes and CARD-FISH.* For all CARD-FISH experiments the 16S rRNA-  
194 targeted oligonucleotide probe EUB338-I (Amann *et al.* 1990) targeting the test strains and  
195 many other but not all bacteria was used. As a negative control probe nonEUB338-I (reverse  
196 complementary probe to EUB338-I) was applied (Wallner *et al.* 1993). Both probes were 5'-  
197 labeled with horseradish peroxidase (HRP) (Thermo Hybaid, Interactiva Division, Ulm,  
198 Germany). CARD-FISH was performed as described previously (Pernthaler *et al.* 2002a;  
199 Hoshino *et al.* 2008). Tyramide signal amplification was conducted for 30 min at 46°C,  
200 which represents a relatively high temperature and long incubation time within the range of

201 incubation settings typically used in CARD-FISH studies (e.g. Ishii *et al.*, 2004; Pernthaler *et*  
202 *al.*, 2002b). The fluorescence of CARD-FISH hybridized cells was verified by  
203 epifluorescence microscopy (see Supplementary Figure 6).

204  
205 *NanoSIMS analysis of E. coli and B. subtilis cells.* NanoSIMS measurements of *E. coli* and  
206 *B. subtilis* cells were carried out on a NanoSIMS 50L (Cameca, Gennevilliers Cedex, France)  
207 at the Large-Instrument Facility for Advanced Isotope Research, University of Vienna.  $^{13}\text{C}$   
208 abundance was inferred from the signal intensities obtained from detection of  $^{12}\text{C}^-$  and  $^{13}\text{C}^-$   
209 secondary ions. In order to optimize the counting statistics in the determination of  $^{15}\text{N}$   
210 abundance,  $^{13}\text{C}^{14}\text{N}^-$  and  $^{13}\text{C}^{15}\text{N}^-$  secondary ions were detected for highly enriched cells and  
211  $^{12}\text{C}^{14}\text{N}^-$  and  $^{12}\text{C}^{15}\text{N}^-$  secondary ions for samples containing cells with  $^{15}\text{N}$  and  $^{13}\text{C}$  enrichment  
212 levels of  $\leq 6$  at%. Each sample was analysed 1 to 4 times on distinct measurement areas, with  
213 an average number of 30 cells per measurement. Image data were evaluated using the  
214 WinImage software package provided by Cameca. Displayed data refer to the arithmetic  
215 mean  $\pm$  standard deviation (SD) over the analysed cells per treatment.

216 *Quantitative evaluation of isotope label dilution.* The dilution of the tracer enrichment (e.g.,  
217 at%  $^{15}\text{N}$ ) in the sampled cells that is the result of sample preparation, including CARD-FISH  
218 treatment, was calculated based on a two end member mixing model (e.g., Faure, 1987)  
219 modified to only account for the addition of the tracer element, not all added material. This  
220 dilution is defined as  $F_{X,add}$ , the fraction of the tracer element  $X$  (e.g., nitrogen) added to the  
221 cells by sample preparation:

222

$$223 \quad F_{X,add} = (a_f - a_i)/(a_{add} - a_i), \quad \text{Eq. 1}$$

224

225 where  $a_i$  and  $a_f$  are the isotopic compositions of the cells before and after sample preparation,  
226 respectively, and  $a_{add}$  is the isotopic composition of the material added to the cells, which we  
227 assume to be natural (e.g.,  $\sim 1.1$  at%  $^{13}\text{C}$  and  $\sim 0.37$  at%  $^{15}\text{N}$ ). Values for  $F_{X,add}$  were estimated  
228 from the isotopic compositions of labeled *E. coli* and *B. subtilis* cells determined before and  
229 after sample preparation including CARD-FISH. With  $F_{X,add}$  estimated with the test  
230 experiments, the initial isotopic composition before sample preparation,  $a_i$ , can be estimated  
231 for unknowns by rearranging Eq. 1 to yield:

232

$$233 \quad a_i = (a_f - a_{add} F_{X,add}) / (1 - F_{X,add}). \quad \text{Eq. 2}$$

234

235 *Detailed derivation of these equations:* The dilution of a tracer in a labeled cell by sample  
236 preparation can be quantified based on a two-component mixing model (e.g., Faure 1986).  
237 Here we present two derivations of this equation. First we present a short derivation starting  
238 from the fraction of the tracer element  $X$  (e.g., nitrogen) in the sampled volume that came  
239 from the labeled cells,  $F_{X,i}$  relative to the fraction of  $X$  added by sample preparation,  $F_{X,add}$ ,  
240 which is defined as the dilution factor in this study. Second we present a longer derivation  
241 based on mass balance, which results in the same relationships. Note that we formulate the  
242 mixing models based on individual elements, not total mass.

243

244 For the first derivation, we start by stating that by definition for a two component system:

245

$$246 \quad F_{X,i} + F_{X,add} = 1. \quad (\text{S1})$$

247  
248  
249  
250

The isotopic composition of these components can be expressed as the tracer abundance,  $a$ , in atom percent (at%) of the tracer isotope  $^A X$  relative to the other stable isotopes of element  $X$ :

$$a_{^A X} = \frac{n_{^A X}}{n_{^A X} + n_{^B X} + n_{^C X} + \dots} \quad (\text{S2})$$

251  
252  
253  
254

where  $n$  is the number of atoms of each isotope of element  $X$  in the sampled volume and the superscripts A, B, C... refer to the mass number of the respective isotope. For carbon and nitrogen, respectively, eq. S2 simplifies to:

$$a_{^{13}\text{C}} = \frac{n_{^{13}\text{C}}}{n_{^{13}\text{C}} + n_{^{12}\text{C}}} \quad \text{and} \quad a_{^{15}\text{N}} = \frac{n_{^{15}\text{N}}}{n_{^{15}\text{N}} + n_{^{14}\text{N}}}$$

255  
256

For simplicity in this first derivation, the tracer abundance is represented as  $a_i$ ,  $a_{add}$ , and  $a_f$  for the isotopic composition before treatment (initial), added, and after treatment (final), respectively. Using the tracer abundance for the initial and added fractions, we can write an equation for the final tracer abundance in the sample,  $a_f$ , for element  $X$ :

261  
262

$$a_i F_{X,i} + a_{add} F_{X,add} = a_f \quad (\text{S3})$$

263  
264

Substituting for  $F_{X,i}$  from eq. S1 we obtain:

265  
266

$$a_i (1 - F_{X,add}) + a_{add} F_{X,add} = a_f \quad (\text{S4})$$

267  
268

Collecting terms yields:

269  
270

$$F_{X,add} (a_{add} - a_i) = (a_f - a_i) \quad (\text{S5})$$

271  
272

Solving for the added fraction, we have:

273  
274

$$F_{X,add} = (a_f - a_i) / (a_{add} - a_i), \quad (\text{S6})$$

275  
276

which is above-mentioned Eq. 1. Using the measured tracer abundance,  $a_f$ , in a cell, this equation allows us to determine the fraction of the tracer element in the measured volume that came from the labeled cell if we use known initial and added isotopic compositions, as in our dilution tests. To calculate the unknown isotopic composition of labeled cells before sample preparation for analysis, we can solve eq. S4 for  $a_i$ :

277  
278  
279  
280  
281

$$a_i = (a_f - a_{add} F_{X,add}) / (1 - F_{X,add}), \quad (\text{S7})$$

282  
283

which is above-mentioned Eq. 2. For unknowns, we measure  $a_f$ , use an estimate of  $F_{add,X}$ , and assume that the isotopic composition of the added material is natural (e.g.,  $a_{add} \sim 1.1$  at%  $^{13}\text{C}$  and  $\sim 0.37$  at%  $^{15}\text{N}$ ).

284  
285  
286  
287

For people who are not familiar with mixing models, below we provide a derivation of the above equations based on the *law of mass conservation*, from which follows:

288  
289  
290  
291  
292

(i) For any considered element  $X$ , the total number of atoms contained in a treated cell is equal to the sum of atoms contained in the cell before treatment and the number of atoms added and/or removed by the treatment

293

$$n_{X,f} = n_{X,i} + n_{X,add} - n_{X,rem} \quad (\text{S8})$$

294 where  $n_x$  refers to the absolute number of atoms of the respective element  $X$  (i.e. the sum  
 295 over all isotopes.) The addenda in the subscripts are acronyms designating the cells *before*  
 296 and *after* the treatment (i.e.,  $i$  and  $f$ , respectively), and the *added* and *removed* compounds  
 297 (i.e., *add.* and *rem.*, respectively).

298 (ii) The number of tracer atoms  $n_{A_x}$  contained in a treated cell is equal to the sum of tracer  
 299 atoms already contained in the cell before treatment and the number of tracer atoms added  
 300 and/or removed by the treatment

$$301 \quad n_{A_x,f} = n_{A_x,i} + n_{A_x,add} - n_{A_x,rem} \quad (S9)$$

302 where the superscript  $A$  refers to the mass number of the isotope utilized as the tracer.  
 303 Using eq. S2 and assuming that the isotopic composition of the removed compounds is  
 304 identical to the isotopic composition of the untreated labeled cells, the mass balance of the  
 305 tracer can be written as:

$$307 \quad n_{x,f} a_{A_x,f} = (n_{x,i} - n_{x,rem}) a_{A_x,i} + n_{x,add} a_{A_x,add} \quad (S10)$$

308  
 309 Rearranging eq. (S10) and substituting for  $n_{x,f}$  from eq. (S8), an equation can be formulated  
 310 that describes the relative change in the elemental concentration arising from the treatment of  
 311 a cell as a function of the observed isotope fraction before and after the treatment.

$$312 \quad \frac{n_{x,add}}{n_{x,i} - n_{x,rem}} = \frac{a_{A_x,i} - a_{A_x,f}}{a_{A_x,f} - a_{A_x,add}} \quad (S11)$$

314  
 315 The amount of removed biomass cannot be determined without more data, including  
 316 concentration data. However, it is worth noting that removal is potentially important. The  
 317 removal of biomass can originate from wash-out of intracellular constituents, the dissolution  
 318 of EtOH soluble compounds, and permeabilization and enzymatic digestion by CARD-FISH  
 319 treatments such as lysozyme, proteinase K or achromopeptidase.

320 The effect of removal on the ratio of added to the initial tracer element  $X$  is evident by re-  
 321 writing Eq. (S11) as:

$$322 \quad \frac{n_{x,add}}{n_{x,i}} = \frac{a_{A_x,i} - a_{A_x,f}}{a_{A_x,f} - a_{A_x,add}} \left( 1 - \frac{n_{x,rem}}{n_{x,i}} \right) \quad (S12)$$

324  
 325  
 326 In practice, the isotopic composition of cells obtained from labeling experiments that need  
 327 identification by CARD-FISH is only determinable after treatment and therefore the question  
 328 is what was the isotopic composition of the analyzed cells before sample preparation. This  
 329 can be obtained by rewriting eq. S11 as:

$$330 \quad a_{A_x,i} = a_{A_x,f} + \frac{n_{x,add}}{n_{x,i} - n_{x,rem}} (a_{A_x,f} - a_{A_x,add}) \quad (S13)$$

331  
 332 which shows that the magnitude of deviation in the isotopic composition of the cells is not  
 333 only, as intuitively expected, proportional to the fraction of added atoms relative to the  
 334 number of atoms retained after removal, but also linearly related to the difference between  
 335 the isotopic composition of the added compounds and the cells. The latter tends to be  
 336 overlooked in first order estimations where the tracer content in natural abundant compounds  
 337 is considered as negligible, which can lead to overestimation of the label content of untreated  
 338 cells in particular at low enrichment levels.

339  
 340 Note that the ratio of the number of added atoms,  $n_{x,add}$ , relative to the number of retained

341 atoms,  $(n_{X,i} - n_{X,rem})$ , (eq. S11) is related to the quantity we are interested in,  $F_{add,X}$ , by the  
342 following relationship:

343  
344 
$$F_{add,X} = [n_{x,add}/(n_{X,i} - n_{X,rem})]/[n_{x,add}/(n_{X,i} - n_{X,rem}) + 1] \quad (S14)$$

345  
346 It can readily be shown that substituting for  $n_{x,add}/(n_{X,i} - n_{X,rem})$  from eq. S11 into eq. S12 we  
347 derive eq. S6 above.

348  
349  
350

### Supplementary Results and Discussion

351 *NanoSIMS of mat microorganisms and effect of CARD-FISH on isotopic enrichment.* In  
352 contrast to *Cyanobacteria* that were identified by their characteristic autofluorescence,  
353 *Deltaproteobacteria* cells were identified by CARD-FISH. This procedure has the potential  
354 to dilute labeling through the introduction of C and N (mainly  $^{12}\text{C}$  and  $^{14}\text{N}$ ) via probe and  
355 tyramide binding (and possibly also via buffer reagents and enzymes used for cell wall  
356 permeabilization that cannot be completely removed during the washing steps). This  
357 deposition in CARD-FISH identified cells may dilute the amount of the rarer heavy isotope  
358 incorporated during the labeling experiment, and possibly could have masked  $^{15}\text{N}$   
359 incorporation by the *Deltaproteobacteria*. To evaluate the magnitude of this dilution effect  
360 and to test for its relevance in this and other NanoSIMS studies we conducted control  
361 experiments with  $^{13}\text{C}$  and  $^{15}\text{N}$ -labeled cells (Supplementary Figure 6, 7 and 8). The  
362 enrichment of fixed cells un-treated by CARD-FISH was 98.56 at%  $^{15}\text{N}$  and 95.31 at%  $^{13}\text{C}$  in  
363 *E. coli*; versus 97.52 at%  $^{15}\text{N}$  and 92.11 at%  $^{13}\text{C}$  in *B. subtilis* cells. After hybridization with  
364 probe EUB338 (Supplementary Figure 6), 70.84 at%  $^{15}\text{N}$  and 62.54 at%  $^{13}\text{C}$ , and 72.52 at%  
365  $^{15}\text{N}$  and 57.03 at%  $^{13}\text{C}$  were measured for *E. coli* and *B. subtilis* cells, respectively.  $^{15}\text{N}$  and  
366  $^{13}\text{C}$  enrichments of cells stained with a negative control probe (Supplementary Figure 6) were  
367 81.50 at% and 74.65 at%, respectively, in *E. coli*, and 89.74 at% and 81.33 at%, respectively,  
368 in *B. subtilis*. Similar trends were detected in cells labeled to only approximately 6 at%  $^{15}\text{N}$   
369 and  $^{13}\text{C}$ , which more closely reflects enrichment levels measured in isotope labeled  
370 environmental samples (e.g. Dekas *et al.*, 2009; Woebken *et al.*, 2012; Ploug *et al.*, 2010)  
371 (Supplementary Figure 7). These data indicate that CARD-FISH analyses with the nonsense  
372 probe can result in an apparent dilution ( $F_{X,add}$ ) of up to 18% for nitrogen, and up to 22% for  
373 carbon. In CARD-FISH experiments with the EUB338 probe, these values increased up to  
374 28% for nitrogen and 38% for carbon.

375 To test whether the deltaproteobacterial  $^{15}\text{N}$  isotope enrichment measured by NanoSIMS  
376 were strongly influenced by CARD-FISH, we used the data from the reference culture  
377 experiments (28% dilution as a worst case scenario for N) to back-calculate the  $^{15}\text{N}$  isotope  
378 enrichment the deltaproteobacterial cells could have had prior to the CARD-FISH procedure.  
379 Based on these calculations, when the CARD-FISH  $^{15}\text{N}$  dilution is accounted for, the  
380 deltaproteobacterial  $^{15}\text{N}$  isotope fraction values increase only slightly, and their corrected  
381 values are still not significantly enriched above natural abundance values (average of 0.38  
382 at%  $^{15}\text{N}$ ,  $p=0.131$ ). We also considered the individual measured values (as opposed to the  
383 population mean), and found that based on the uncorrected values, 20.4% of the cells are  
384 significantly enriched in  $^{15}\text{N}$  based on a 95% confidence interval. This number increases to  
385 31.5% if the dilution through CARD-FISH is taken into account. Based on these data we  
386 suggest that the CARD-FISH protocol has an effect on the  $^{13}\text{C}$  and  $^{15}\text{N}$  isotopic composition.  
387 This staining technique and similarly the halogen *in situ* CARD approaches (Musat *et al.*,  
388 2008; Behrens *et al.*, 2008) used for halogen-based identification of microbes in NanoSIMS  
389 analyses can change the fraction of a population that is considered enriched if values are  
390 close to natural abundance (as was the case for *Deltaproteobacteria* in this study) (see



391 extended discussion of this point below). However, the  $^{15}\text{N}$  enrichment values of investigated  
392 *Deltaproteobacteria* in this study changed very little when CARD-FISH dilution was  
393 accounted for, supporting our previous conclusion that the targeted *Deltaproteobacteria* were  
394 not significantly enriched in  $^{15}\text{N}$ .

395  
396 *Factors of CARD-FISH influencing the isotopic composition in microbial cells.* As  
397 mentioned above, loss of labeled cell material is possible due to wash-out of intracellular  
398 constituents through EtOH treatments and enzymatic lysis steps. The steps in the CARD-  
399 FISH protocol introducing  $^{12}\text{C}$  and  $^{14}\text{N}$  into the cells are most likely again enzymatic  
400 treatments (such as lysozyme for permeabilization) and the hybridization buffers containing  
401 blocking reagent and dextrane sulfate, as apparent by the fact that hybridization with the  
402 nonsense probe (nonEUB338) reduced the  $^{15}\text{N}$  and  $^{13}\text{C}$  enrichment without probe binding and  
403 tyramide signal amplification (Supplementary Figure 6 and 7). In probe-stained cells (e.g.  
404 with probe EUB338 in our test study), probe binding and the deposition of tyramides in the  
405 amplification reaction lead to further dilution and thereby decrease the isotope content in the  
406 cells (Supplementary Figure 6 and 7).

407  
408 *Impact of the dilution through CARD-FISH on data interpretation.* Since CARD-FISH does  
409 influence the isotopic composition of microbial cells (Supplementary 7), it is of importance  
410 to investigate how quantitative conclusions based on NanoSIMS data (e.g. species A is more  
411 enriched and therefore was more active than species B) are effected by the introduction of C-  
412 and N-atoms through CARD-FISH. The following scenarios can exist:

- 413 (1) One target group (group A) was identified by CARD-FISH, the other (group B) could  
414 be identified by morphology and did not go through the CARD-FISH procedure (like  
415 in this study the *Deltaproteobacteria* and the *Cyanobacteria*; both being investigated  
416 independently). In this case, only group A is affected by the introduction of C and N,  
417 but not group B.
- 418 (2) In the second scenario, again one group (group A) was stained by a probe whereas the  
419 second population (group B) was identified solely by morphological distinct features  
420 (so no CARD-FISH identification necessary) (e.g. the case in Thompson *et al.*, 2012).  
421 However, in this scenario group B would be analyzed on the same wafer/filter as  
422 group A and therefore went through the CARD-FISH procedure - such as the cells  
423 undergoing hybridization with the nonsense probe (nonEUB338) in our test study.  
424 The isotopic enrichment of cells in group A will be diluted like the cells stained with  
425 probe EUB338 in our test (Supplementary Figure 7), and cells belonging to group B  
426 will experience less dilution. This group will experience a dilution similar to the cells  
427 that went through CARD-FISH with the nonsense probe (Supplementary Figure 7).  
428 Thereby, different dilution factors would have to be considered for these different  
429 groups.
- 430 (3) Alternatively, both groups are stained by CARD-FISH (or analysis of three groups as  
431 in Musat *et al.*, 2008), but one group (e.g. group A) is much more active than the  
432 other. Cells of group A will have a higher ribosome content and therefore more  
433 probes can bind to rRNA and more tyramides can be deposited in the cell. Hence,  
434 cells of group A could encounter a stronger dilution in their  $^{13}\text{C}$  and  $^{15}\text{N}$  enrichment  
435 than group B. Analyzed by NanoSIMS, group A could appear less enriched in  $^{13}\text{C}$  or  
436  $^{15}\text{N}$  than group B (although both for example incorporated the same amount of  
437 isotopically labeled substrate), and the false conclusion would be that group B was  
438 more active than group A. Similar biases can be introduced in this scenario if probes  
439 for different target microbes show strong differences in binding efficiency or if

440 differences in the cell wall composition of different target microbes leads to strong  
441 differences in permeability of the fixed cells for the HRP-labeled probes.

442  
443 In this context it should be noted that the *E. coli* and *B. subtilis* reference cells in our test  
444 study had a high cellular ribosome content (Supplementary Figure 6). Consequently, the  
445 back-calculation applied to correct the  $^{15}\text{N}$  values of the deltaproteobacterial cells for CARD-  
446 FISH dilution reflected the “worst” situation (strong dilution due to high ribosome content).  
447 Ultimately, whether the dilution caused by CARD-FISH will have a significant effect in  
448 quantitative NanoSIMS studies of microbial communities tackling questions like “Is species  
449 A more labelled than species B?” or “Which species are significantly labelled compared to  
450 the natural abundance control?” is dependent on how different the measured isotopic  
451 enrichments of the targeted groups are and on whether the isotopic enrichments of the  
452 analysed cells are close to natural abundance values. The greater the enrichment differences  
453 of both target groups and the larger the enrichment difference of target microbes to natural  
454 abundance, the more confident one can be that CARD-FISH will not obscure the results of  
455 the single-cell isotope measurements.

456 It is worth noting that these dilution effects are relative to the natural abundance baseline  
457 of  $\sim 0.37$  at%  $^{15}\text{N}$ . Therefore, for small enrichments, the correction is correspondingly small.  
458 For example, the small cyanobacteria in this study are enriched to 0.6 at%  $^{15}\text{N}$ , without  
459 CARD-FISH treatment. Based on Eq.1 in the text, solving for  $a_f$ , the enrichment of the small  
460 cyanobacteria would have been reduced to a value of 0.53 at%  $^{15}\text{N}$  by CARD-FISH, which  
461 would still be easily detected. Because NanoSIMS isotopic measurements of bacteria are  
462 typically accurate to better than 5 percent of the measured value (e.g., 0.37 at%  $^{15}\text{N}$   $\pm$  0.02),  
463 enrichment above background only becomes difficult to detect when the enrichment is  
464 relatively low (e.g.,  $<0.4$  at%  $^{15}\text{N}$ ).

465 However, particular care should be taken in estimating quantitative uptake rates of  
466  $^{13}\text{C}$  and/or  $^{15}\text{N}$ -labeled substrates based on NanoSIMS measurements of cells identified by  
467 CARD-FISH as the deposition of C and N by this staining technique will lead to an  
468 underestimation of the actual rates in dependence of the ribosome content of the target cells.  
469 In contrast, dilution of  $^{13}\text{C}$  or  $^{15}\text{N}$  in cells will be much less pronounced if identification of  
470 target organisms for NanoSIMS measurements is not performed by CARD-FISH, but by  
471 FISH protocols that do not include signal amplification steps and do not require extensive  
472 cell permeabilization and pre-treatment (e.g. blocking) procedures (Orphan *et al.*, 2001; Li *et*  
473 *al.*, 2008; Berry *et al.*, 2013). However, in many ecosystems such as microbial mats  
474 (Woebken *et al.*, 2012), sediments (Morono *et al.*, 2011) or soils, strong autofluorescence can  
475 render FISH with probes directly linked to fluorochromes (such as mono-labeled or dual-  
476 labeled probes) difficult. The same applies to FISH of cells with very low ribosome content  
477 such as marine water samples (e.g. Musat *et al.*, 2008 and Thompson *et al.*, 2012). For those  
478 samples, CARD-FISH remains the best choice for identification, and for quantitative isotope  
479 analysis one should consider the above-mentioned points.

## 480 481 **References**

482 Amann RI, Binder BJ, Olson RJ, Chisholm SW, Devereux R, Stahl DA. (1990). Combination  
483 of 16S rRNA-targeted oligonucleotide probes with flow cytometry for analyzing mixed  
484 microbial populations. *Appl Environ Microbiol* 56:1919–1925.

485 Bebout B, Fitzpatrick M, Paerl H. (1993). Identification of the sources of energy for nitrogen  
486 fixation and physiological characterization of nitrogen-fixing members of a marine microbial  
487 mat community. *Appl Environ Microbiol* 59:1495–1503.

488 Behrens S, Lösekann T, Pett-Ridge J, Weber PK, Ng W-O, Stevenson BS *et al.* (2008).  
489 Linking microbial phylogeny to metabolic activity at the single-cell level by using enhanced  
490 element labeling-catalyzed reporter deposition fluorescence in situ hybridization (EL-FISH)  
491 and NanoSIMS. *Appl Environ Microbiol.* 74:3143–3150.

492 Berry D, Stecher B, Schintlmeister A, Reichert J, Brugiroux S, Wildd B, *et al.* (2013). Host-  
493 compound foraging by intestinal microbiota revealed by single-cell stable isotope probing.  
494 *Proc Natl Acad Sci USA* 110: 4720-4725.

495 Dekas AE, Poretsky RS, Orphan VJ. (2009). Deep-sea archaea fix and share nitrogen in  
496 methane-consuming microbial consortia. *Science* 326:422–426.

497 Edgar RC. (2004). MUSCLE: multiple sequence alignment with high accuracy and high  
498 throughput. *Nucleic Acids Res* 32:1792–1797.

499 Faure G. (1986). *Principles of Isotope Geology*. John Wiley & Sons, Inc.: New York, pp 141-  
500 151.

501 Hoshino T, Yilmaz LS, Noguera DR, Daims H, Wagner M. (2008). Quantification of target  
502 molecules needed to detect microorganisms by fluorescence *in situ* hybridization (FISH) and  
503 catalyzed reporter deposition-FISH. *Appl Environ Microbiol* 74:5068–5077.

504 Ishii K, Musmann M, MacGregor BJ, Amann R. (2004). An improved fluorescence *in situ*  
505 hybridization protocol for the identification of bacteria and archaea in marine sediments.  
506 *FEMS Microbiol Ecol* 50:203–213.

507 Lane DJ. (1991). 16S/23S rRNA sequencing. In: Stackebrandt E, Goodfellow M (eds.).  
508 *Nucleic Acid Techniques in Bacterial Systematics*. John Wiley and Sons Ltd.: Chichester, pp  
509 115–175.

510 Lane DJ, Pace B, Olsen GJ, Stahl DA, Sogin ML, Pace NR. (1985). Rapid determination of  
511 16S ribosomal RNA sequences for phylogenetic analyses. *Proc Natl Acad Sci USA* 82:6955–  
512 6959.

513 Li T, Wu T-D, Mazéas L, Toffin L, Guerquin-Kern J-L, Leblon G, *et al.* (2008).  
514 Simultaneous analysis of microbial identity and function using NanoSIMS. *Environ*  
515 *Microbiol* 10:580–588.

516 Ludwig W, Strunk O, Westram R, Richter L, Meier H, Yadhukumar, *et al.* (2004). ARB: a  
517 software environment for sequence data. *Nucleic Acids Res* 32:1363–1371.

518 Morono Y, Terada T, Nishizawa M, Ito M, Hillion F, Takahata N, *et al.* (2011). Carbon and  
519 nitrogen assimilation in deep seafloor microbial cells. *Proc Natl Acad Sci USA*  
520 108:18295–18300.

521 Musat N, Halm H, Winterholler B, Hoppe P, Peduzzi S, Hillion F, *et al.* (2008). A single-cell  
522 view on the ecophysiology of anaerobic phototrophic bacteria. *Proc Natl Acad Sci USA*  
523 105:17861–17866.

524 Orphan VJ, House CH, Hinrichs KU, McKeegan KD, DeLong EF. (2001). Methane-  
525 consuming archaea revealed by directly coupled isotopic and phylogenetic analysis. *Science*  
526 293:484–487.

- 527 Pernthaler A, Pernthaler J, Amann R. (2002a). Fluorescence *in situ* hybridization and  
528 catalyzed reporter deposition for the identification of marine bacteria. *Appl Environ*  
529 *Microbiol* 68:3094–3101.
- 530 Pernthaler A, Pernthaler J, Schattenhofer M, Amann R. (2002b). Identification of DNA-  
531 synthesizing bacterial cells in coastal North Sea plankton. *Appl Environ Microbiol* 68:5728–  
532 5736.
- 533 Ploug H, Musat N, Adam B, Moraru CL, Lavik G, Vagner T *et al.* (2010). Carbon and  
534 nitrogen fluxes associated with the cyanobacterium *Aphanizomenon* sp. in the Baltic Sea.  
535 *ISME J* 4:1215–1223.
- 536 Pruesse E, Quast C, Knittel K, Fuchs BM, Ludwig W, Peplies J, *et al.* (2007). SILVA: a  
537 comprehensive online resource for quality checked and aligned ribosomal RNA sequence  
538 data compatible with ARB. *Nucleic Acids Res* 35:7188–7196.
- 539 Pruesse E, Peplies J, Glöckner FO. (2012). SINA: Accurate high-throughput multiple  
540 sequence alignment of ribosomal RNA genes. *Bioinformatics* 28: 1823–1829.
- 541 Roller C, Wagner M, Amann R, Ludwig W, Schleifer KH. (1994). *In situ* probing of gram-  
542 positive bacteria with high DNA G+C content using 23S rRNA-targeted oligonucleotides.  
543 *Microbiology* 140:2849–2858.
- 544 Thompson AW, Foster RA, Krupke A, Carter BJ, Musat N, Vaulot D, *et al.* (2012).  
545 Unicellular cyanobacterium symbiotic with a single-celled eukaryotic alga. *Science*  
546 337:1546–1550.
- 547 Wallner G, Amann R, Beisker W. (1993). Optimizing fluorescent *in situ* hybridization with  
548 rRNA-targeted oligonucleotide probes for flow cytometric identification of microorganisms.  
549 *Cytometry* 14:136–143.
- 550 Wang Q, Garrity GM, Tiedje JM, Cole JR. (2007). Naive Bayesian classifier for rapid  
551 assignment of rRNA sequences into the new bacterial taxonomy. *Appl Environ Microbiol*  
552 73:5261–5267.
- 553 Widdel F, Pfennig N. (1981). Sporulation and further nutritional characteristics of  
554 *Desulfotomaculum acetoxidans*. *Arch Microbiol* 129:401-402.
- 555 Woebken D, Burow LC, Prufert-Bebout L, Bebout BM, Hoehler TM, Pett-Ridge J, *et al.*  
556 (2012). Identification of a novel cyanobacterial group as active diazotrophs in a coastal  
557 microbial mat using NanoSIMS analysis. *ISME J* 6:1427–1439.
- 558 Zehr JP, Turner PJ. (2001). Nitrogen fixation: Nitrogenase genes and gene expression. In:  
559 Paul JH (ed.). *Methods in Microbiology*. Academic Press: New York pp 271–286.
