# Supplementary material for: Revisiting N2 fixation in Guerrero Negro intertidal microbial mats with a functional single-cell approach
Source: PubMed Central journal article supplement — ISME J. 2014 Oct 10;9(2):485–96. doi: 10.1038/ismej.2014.144 (PMC4303640; doi:10.1038/ismej.2014.144), 2014-10-10
Supplement: ismej2014144x11.pdf [file ismej2014144x11.pdf]

Supplementary Table 1: Overview of the 454 pyrotag amplicon libraries analyzed in this study. DNA and RNA were co-extracted from two biological replicate mats (designated "454 replicate 1" and "454 replicate 2") originating from the diel cycle studies conducted at NASA Ames.

|                                               | DNA samples     |                 | cDNA samples    |                 |
|-----------------------------------------------|-----------------|-----------------|-----------------|-----------------|
|                                               | 454 replicate 1 | 454 replicate 2 | 454 replicate 1 | 454 replicate 2 |
| <b>Total sequences</b>                        | 20616           | 15524           | 20138           | 22246           |
| <b>Sequences after quality assessment</b>     | 16539           | 12393           | 15412           | 16840           |
| <b>Average sequence length after trimming</b> | 389             | 388             | 382             | 382             |
| <b>Chao1 *</b>                                | 5530 / 1181     | 5248 / 1085     | 1539 / 476      | 2084 / 559      |
| <b>Shannon index *</b>                        | 6.43 / 5.41     | 6.42 / 5.43     | 3.73 / 2.29     | 4.16 / 2.60     |

\* calculated with an OTU cut-off of 97% and 90%, respectively
