# Supplementary material for: Revisiting N2 fixation in Guerrero Negro intertidal microbial mats with a functional single-cell approach
Source: PubMed Central journal article supplement — ISME J. 2014 Oct 10;9(2):485–96. doi: 10.1038/ismej.2014.144 (PMC4303640; doi:10.1038/ismej.2014.144), 2014-10-10
Supplement: ismej2014144x12.pdf [file ismej2014144x12.pdf]

Supplementary Table 2: Overview of the taxonomic classification of 16S rRNA and 16S rRNA gene sequences derived by Sanger and 454 amplicon sequencing. Reads were analyzed with the RDP Classifier (Wang *et al.*, 2007) (<http://rdp.cme.msu.edu/classifier/classifier.jsp>). Numbers depict relative sequence abundances (%). Sanger 1 and 2 are two biological replicates, the same applies to 454 amplicon 1 and 2.

| Phyla                      | DNA samples        |                    |         |       |                 |                 |         |       | cDNA samples       |                    |         |       |                 |                 |         |       |
|----------------------------|--------------------|--------------------|---------|-------|-----------------|-----------------|---------|-------|--------------------|--------------------|---------|-------|-----------------|-----------------|---------|-------|
|                            | Sanger replicate 1 | Sanger replicate 2 | average | STDEV | 454 replicate 1 | 454 replicate 2 | average | STDEV | Sanger replicate 1 | Sanger replicate 2 | average | STDEV | 454 replicate 1 | 454 replicate 2 | average | STDEV |
| <b>Actinobacteria</b>      | 0.00               | 0.00               | 0.00    | 0.00  | 0.18            | 0.25            | 0.21    | 0.05  | 0.65               | 0.60               | 0.63    | 0.04  | 0.34            | 0.26            | 0.30    | 0.06  |
| <b>Armatimonadetes</b>     | 0.00               | 0.00               | 0.00    | 0.00  | 0.08            | 0.01            | 0.04    | 0.05  | 0.00               | 0.00               | 0.00    | 0.00  | 0.00            | 0.01            | 0.00    | 0.00  |
| <b>Bacteroidetes</b>       | 32.81              | 17.42              | 25.12   | 10.88 | 10.53           | 10.97           | 10.75   | 0.32  | 6.54               | 8.43               | 7.48    | 1.34  | 2.94            | 3.51            | 3.22    | 0.40  |
| <b>Chlorobi</b>            | 0.00               | 0.00               | 0.00    | 0.00  | 0.10            | 0.05            | 0.08    | 0.04  | 0.00               | 0.00               | 0.00    | 0.00  | 0.01            | 0.02            | 0.01    | 0.01  |
| <b>Chloroflexi</b>         | 11.72              | 6.06               | 8.89    | 4.00  | 28.10           | 13.33           | 20.72   | 10.45 | 8.50               | 6.02               | 7.26    | 1.75  | 2.04            | 2.66            | 2.35    | 0.44  |
| <b>Cyanobacteria</b>       | 4.69               | 9.47               | 7.08    | 3.38  | 13.18           | 11.91           | 12.55   | 0.90  | 56.86              | 62.05              | 59.46   | 3.67  | 77.13           | 69.76           | 73.45   | 5.22  |
| <b>Deinococcus-Thermus</b> | 0.78               | 2.27               | 1.53    | 1.05  | 0.26            | 0.53            | 0.40    | 0.19  | 0.00               | 0.00               | 0.00    | 0.00  | 0.01            | 0.01            | 0.01    | 0.00  |
| <b>Firmicutes</b>          | 0.00               | 0.00               | 0.00    | 0.00  | 0.03            | 0.01            | 0.02    | 0.02  | 0.00               | 0.00               | 0.00    | 0.00  | 0.00            | 0.02            | 0.01    | 0.02  |
| <b>Lentisphaerae</b>       | 0.00               | 0.00               | 0.00    | 0.00  | 0.03            | 0.00            | 0.02    | 0.02  | 0.00               | 0.00               | 0.00    | 0.00  | 0.00            | 0.01            | 0.00    | 0.00  |
| <b>Planctomycetes</b>      | 1.95               | 4.17               | 3.06    | 1.57  | 2.38            | 3.51            | 2.95    | 0.80  | 1.31               | 0.60               | 0.95    | 0.50  | 0.32            | 0.61            | 0.46    | 0.20  |
| <b>Proteobacteria</b>      | 30.08              | 36.36              | 33.22   | 4.44  | 20.18           | 34.20           | 27.19   | 9.91  | 19.61              | 15.66              | 17.64   | 2.79  | 7.17            | 8.40            | 7.78    | 0.87  |
| <b>Cand. Division SR1</b>  | 0.78               | 0.00               | 0.39    | 0.55  | 0.00            | 0.00            | 0.00    | 0.00  | 0.00               | 0.00               | 0.00    | 0.00  | 0.00            | 0.00            | 0.00    | 0.00  |
| <b>Spirochaetes</b>        | 0.39               | 3.03               | 1.71    | 1.87  | 1.92            | 2.14            | 2.03    | 0.15  | 0.65               | 0.00               | 0.33    | 0.46  | 0.08            | 0.11            | 0.10    | 0.02  |
| <b>TM7</b>                 | 0.00               | 0.00               | 0.00    | 0.00  | 0.01            | 0.00            | 0.00    | 0.00  | 0.00               | 0.00               | 0.00    | 0.00  | 0.00            | 0.00            | 0.00    | 0.00  |
| <b>Verrucomicrobia</b>     | 0.78               | 9.47               | 5.13    | 6.14  | 1.82            | 2.49            | 2.16    | 0.48  | 0.65               | 1.81               | 1.23    | 0.82  | 0.38            | 0.32            | 0.35    | 0.04  |
| <b>Euryarchaeota</b>       | 0.00               | 0.00               | 0.00    | 0.00  | 0.04            | 0.02            | 0.03    | 0.01  | 0.00               | 0.00               | 0.00    | 0.00  | 0.01            | 0.01            | 0.01    | 0.00  |
| <b>not assigned</b>        | 16.02              | 11.74              | 13.88   | 3.02  | 21.17           | 20.58           | 20.88   | 0.41  | 5.23               | 4.82               | 5.02    | 0.29  | 9.56            | 14.30           | 11.93   | 3.35  |
