# Supplementary material for: Revisiting N2 fixation in Guerrero Negro intertidal microbial mats with a functional single-cell approach
Source: PubMed Central journal article supplement — ISME J. 2014 Oct 10;9(2):485–96. doi: 10.1038/ismej.2014.144 (PMC4303640; doi:10.1038/ismej.2014.144), 2014-10-10
Supplement: ismej2014144x13.pdf [file ismej2014144x13.pdf]

Supplementary Table 3: <sup>15</sup>N enrichment values (at%) of microbial community members measured by NanoSIMS after nighttime incubation of microbial mat samples with <sup>15</sup>N<sub>2</sub>. Asterisks indicate cells measured for natural abundance in T0 mat samples (not incubated with <sup>15</sup>N<sub>2</sub>). The depicted data of *Deltaproteobacteria* and unidentified cells refer to single cell measurements. For small filamentous *Cyanobacteria*, depicted values represent the mean of 3-10 cells measured per filament. For *Lyngbya* spp.-related *Cyanobacteria* (due to their large size), isotope enrichment measurements were conducted by focused and accelerated sputtering utilizing high primary ion beam currents (~1 nA, 2 μm beam size).

| Analyzed cell type  | <sup>15</sup> N (at%) | Analyzed cell type   | <sup>15</sup> N (at%) | Analyzed cell type          | <sup>15</sup> N (at%) | Analyzed cell type         | <sup>15</sup> N (at%) |
|---------------------|-----------------------|----------------------|-----------------------|-----------------------------|-----------------------|----------------------------|-----------------------|
| <i>Lyngbya</i> spp. | 2.78                  | small filamentous    | 0.84                  | <i>Delta-proteobacteria</i> | 0.38                  | <i>Deltaproteobacteria</i> | 0.37                  |
|                     | 2.56                  | <i>Cyanobacteria</i> | 0.40                  |                             | 0.38                  | (natural abundance)*       | 0.37                  |
|                     | 1.12                  |                      | 0.39                  |                             | 0.35                  |                            | 0.37                  |
|                     | 0.40                  |                      | 0.92                  |                             | 0.37                  |                            | 0.37                  |
|                     | 0.59                  |                      | 0.52                  |                             | 0.38                  |                            | 0.37                  |
|                     | 0.61                  |                      | 0.42                  |                             | 0.38                  |                            | 0.37                  |
|                     | 1.89                  |                      | 0.97                  |                             | 0.37                  |                            | 0.37                  |
|                     | 2.92                  |                      | 0.53                  |                             | 0.36                  |                            | 0.37                  |
|                     | 1.89                  |                      | 0.44                  |                             | 0.37                  |                            | 0.37                  |
|                     | 7.65                  |                      | 0.66                  |                             | 0.36                  |                            | 0.37                  |
|                     | 0.38                  |                      | 0.37                  |                             | 0.39                  |                            | 0.37                  |
|                     | 1.74                  |                      | 0.71                  |                             | 0.37                  |                            | 0.37                  |
|                     | 8.01                  |                      | 0.77                  |                             | 0.37                  |                            | 0.37                  |
|                     | 1.78                  |                      | 1.18                  |                             | 0.41                  |                            | 0.38                  |
|                     | 0.39                  |                      | 0.94                  |                             | 0.37                  |                            | 0.38                  |
|                     | 14.54                 |                      | 0.39                  |                             | 0.37                  |                            | 0.39                  |
|                     | 13.30                 |                      | 0.91                  |                             | 0.37                  |                            | 0.38                  |
|                     | 1.10                  |                      | 0.60                  |                             | 0.36                  | average                    | 0.37                  |
|                     | 4.56                  |                      | 0.67                  |                             | 0.37                  | SD                         | 0.01                  |
|                     | 2.54                  |                      | 0.40                  |                             | 0.37                  | SE                         | 0.00                  |
|                     | 1.22                  |                      | 1.17                  |                             | 0.39                  |                            | 4.30                  |
|                     | 1.93                  |                      | 0.61                  |                             | 0.39                  |                            | 2.61                  |
|                     | 1.50                  |                      | 0.80                  |                             | 0.40                  |                            | 0.84                  |
|                     | 0.85                  |                      | 0.99                  |                             | 0.39                  | average                    | 2.60                  |
|                     | 1.24                  |                      | 0.54                  |                             | 0.39                  | SD                         | 1.92                  |
|                     | 3.35                  |                      | 0.80                  |                             | 0.38                  | SE                         | 0.41                  |
|                     | 2.84                  |                      | 0.41                  |                             | 0.39                  |                            |                       |
|                     | 9.37                  |                      | 0.98                  |                             | 0.38                  |                            |                       |
|                     | 1.69                  |                      | 0.40                  |                             | 0.38                  |                            |                       |
|                     | 4.63                  |                      | 0.72                  |                             | 0.36                  |                            |                       |
|                     | 9.70                  |                      | 1.32                  |                             | 0.39                  |                            |                       |
|                     | 1.85                  |                      | 0.70                  |                             | 0.41                  |                            |                       |
|                     | 5.63                  |                      | 0.47                  |                             | 0.37                  |                            |                       |
|                     | 8.02                  |                      | 0.43                  |                             | 0.35                  |                            |                       |
|                     | 11.38                 |                      | 0.67                  |                             | 0.38                  |                            |                       |
|                     | 1.81                  |                      | 0.67                  |                             | 0.36                  |                            |                       |
|                     | 6.23                  |                      | 0.76                  |                             | 0.36                  |                            |                       |
|                     | 6.90                  |                      | 1.25                  |                             | 0.36                  |                            |                       |
|                     | 0.38                  |                      | 0.61                  |                             | 0.37                  |                            |                       |
|                     | 0.40                  |                      | 0.48                  |                             | 0.38                  |                            |                       |
|                     | 6.70                  |                      | 0.83                  |                             | 0.40                  |                            |                       |
|                     | 2.07                  |                      | 0.71                  |                             | 0.36                  |                            |                       |
|                     | 2.57                  |                      | 1.02                  |                             | 0.37                  |                            |                       |
|                     | 13.17                 |                      | 0.74                  |                             | 0.37                  |                            |                       |
|                     | 1.82                  |                      | 0.80                  |                             | 0.38                  |                            |                       |
|                     | 9.28                  |                      | 0.46                  |                             | 0.37                  |                            |                       |
|                     | 9.29                  |                      | 0.42                  |                             | 0.38                  |                            |                       |
|                     | 8.93                  |                      | 0.46                  |                             | 0.38                  |                            |                       |
|                     | 11.70                 |                      | 0.52                  |                             | 0.38                  |                            |                       |
|                     | 2.93                  |                      | 0.43                  |                             | 0.38                  |                            |                       |
| average             | 4.40                  |                      | 0.44                  |                             | 0.38                  |                            |                       |
| SD                  | 4.02                  |                      | 0.46                  |                             | 0.38                  |                            |                       |
| SE                  | 0.57                  |                      | 0.46                  |                             | 0.38                  |                            |                       |
|                     |                       |                      | 0.70                  |                             | 0.37                  |                            |                       |
|                     |                       |                      | 0.99                  | average                     | 0.38                  |                            |                       |
|                     |                       |                      | 0.45                  | SD                          | 0.01                  |                            |                       |
|                     |                       |                      | 0.41                  | SE                          | 0.00                  |                            |                       |
|                     |                       |                      | 0.54                  |                             |                       |                            |                       |
|                     |                       |                      | 0.62                  |                             |                       |                            |                       |
|                     |                       |                      | 0.80                  |                             |                       |                            |                       |
|                     |                       |                      | 0.52                  |                             |                       |                            |                       |
|                     |                       |                      | 0.63                  |                             |                       |                            |                       |
|                     |                       |                      | 0.48                  |                             |                       |                            |                       |
|                     |                       |                      | 0.66                  |                             |                       |                            |                       |
|                     |                       |                      | 0.53                  |                             |                       |                            |                       |
|                     |                       |                      | 0.53                  |                             |                       |                            |                       |
|                     |                       |                      | 0.62                  |                             |                       |                            |                       |
|                     |                       |                      | 0.49                  |                             |                       |                            |                       |
|                     |                       |                      | 0.77                  |                             |                       |                            |                       |
|                     |                       |                      | 0.51                  |                             |                       |                            |                       |
|                     |                       |                      | 0.46                  |                             |                       |                            |                       |
|                     |                       |                      | 0.51                  |                             |                       |                            |                       |
|                     |                       |                      | 0.43                  |                             |                       |                            |                       |
|                     |                       |                      | 0.40                  |                             |                       |                            |                       |
|                     |                       |                      | 0.57                  |                             |                       |                            |                       |
|                     |                       |                      | 0.75                  |                             |                       |                            |                       |
|                     |                       |                      | 0.47                  |                             |                       |                            |                       |
|                     |                       |                      | 0.55                  |                             |                       |                            |                       |
|                     |                       |                      | 0.45                  |                             |                       |                            |                       |
|                     |                       |                      | 0.44                  |                             |                       |                            |                       |
|                     |                       |                      | 0.50                  |                             |                       |                            |                       |
|                     |                       |                      | 0.57                  |                             |                       |                            |                       |
|                     |                       |                      | 0.49                  |                             |                       |                            |                       |
|                     |                       |                      | 0.66                  |                             |                       |                            |                       |
|                     |                       |                      | 0.51                  |                             |                       |                            |                       |
|                     |                       |                      | 0.66                  |                             |                       |                            |                       |
|                     |                       |                      | 0.69                  |                             |                       |                            |                       |
|                     |                       |                      | 1.20                  |                             |                       |                            |                       |
|                     |                       |                      | 0.85                  |                             |                       |                            |                       |
|                     |                       |                      | 0.50                  |                             |                       |                            |                       |
|                     |                       |                      | 0.44                  |                             |                       |                            |                       |
|                     |                       |                      | 0.46                  |                             |                       |                            |                       |
|                     |                       |                      | 0.51                  |                             |                       |                            |                       |
|                     |                       |                      | 0.78                  |                             |                       |                            |                       |
|                     |                       |                      | 0.79                  |                             |                       |                            |                       |
|                     |                       |                      | 0.46                  |                             |                       |                            |                       |
|                     |                       |                      | 0.39                  |                             |                       |                            |                       |
|                     |                       |                      | 0.52                  |                             |                       |                            |                       |
|                     |                       |                      | 0.61                  |                             |                       |                            |                       |

|                |             |
|----------------|-------------|
|                | 0.55        |
|                | 0.45        |
|                | 0.40        |
|                | 0.42        |
|                | 0.41        |
|                | 0.36        |
|                | 0.36        |
|                | 0.64        |
|                | 0.40        |
|                | 0.41        |
|                | 0.37        |
|                | 0.46        |
|                | 0.53        |
|                | 0.48        |
|                | 0.97        |
|                | 0.68        |
|                | 0.47        |
|                | 0.39        |
|                | 0.73        |
|                | 0.40        |
|                | 0.37        |
|                | 0.47        |
|                | 0.58        |
| <b>average</b> | <b>0.60</b> |
| <b>SD</b>      | <b>0.21</b> |
| <b>SE</b>      | <b>0.02</b> |
