# Supplementary material for: Revisiting N2 fixation in Guerrero Negro intertidal microbial mats with a functional single-cell approach
Source: PubMed Central journal article supplement — ISME J. 2014 Oct 10;9(2):485–96. doi: 10.1038/ismej.2014.144 (PMC4303640; doi:10.1038/ismej.2014.144), 2014-10-10
Supplement: ismej2014144x14.pdf [file ismej2014144x14.pdf]

Supplementary Table 4. <sup>14</sup>N and <sup>13</sup>C enrichment values (depicted as isotopes ratios and in‰) of E. coli and B. subtilis cells measured by NanoSIMS. Listed values are derived from cells fixed in formaldehyde and ethanol, respectively.

| E. coli 99 cells - PFA fixed     |                                  |                                      |                                      | E. coli 6 cells - PFA fixed      |                                  |                                      |                                      | B. subtilis 99 cells - Ethanol fixed |                                  |                                      |                                      | B. subtilis 6 cells - Ethanol fixed |                                  |                                      |                                      |
|----------------------------------|----------------------------------|--------------------------------------|--------------------------------------|----------------------------------|----------------------------------|--------------------------------------|--------------------------------------|--------------------------------------|----------------------------------|--------------------------------------|--------------------------------------|-------------------------------------|----------------------------------|--------------------------------------|--------------------------------------|
| <sup>14</sup> N/ <sup>15</sup> N | <sup>13</sup> C/ <sup>12</sup> C | <sup>14</sup> N/ <sup>15</sup> N (‰) | <sup>13</sup> C/ <sup>12</sup> C (‰) | <sup>14</sup> N/ <sup>15</sup> N | <sup>13</sup> C/ <sup>12</sup> C | <sup>14</sup> N/ <sup>15</sup> N (‰) | <sup>13</sup> C/ <sup>12</sup> C (‰) | <sup>14</sup> N/ <sup>15</sup> N     | <sup>13</sup> C/ <sup>12</sup> C | <sup>14</sup> N/ <sup>15</sup> N (‰) | <sup>13</sup> C/ <sup>12</sup> C (‰) | <sup>14</sup> N/ <sup>15</sup> N    | <sup>13</sup> C/ <sup>12</sup> C | <sup>14</sup> N/ <sup>15</sup> N (‰) | <sup>13</sup> C/ <sup>12</sup> C (‰) |
| 88.87                            | 88.86                            | 25.50                                | 86.23                                | 0.06                             | 5.28                             | 0.06                                 | 5.39                                 | 22.21                                | 95.09                            | 10.54                                | 91.83                                | 0.06                                | 5.53                             | 0.06                                 | 5.75                                 |
| 91.80                            | 88.87                            | 25.45                                | 86.23                                | 0.06                             | 5.27                             | 0.06                                 | 5.32                                 | 22.47                                | 95.79                            | 10.54                                | 92.64                                | 0.06                                | 5.53                             | 0.06                                 | 5.68                                 |
| 87.83                            | 88.87                            | 25.15                                | 86.18                                | 0.06                             | 5.27                             | 0.06                                 | 5.34                                 | 22.70                                | 95.78                            | 10.06                                | 93.36                                | 0.06                                | 5.53                             | 0.06                                 | 5.62                                 |
| 86.03                            | 88.87                            | 23.11                                | 86.89                                | 0.06                             | 5.27                             | 0.06                                 | 5.46                                 | 22.96                                | 95.83                            | 11.06                                | 93.03                                | 0.06                                | 5.47                             | 0.06                                 | 5.79                                 |
| 84.72                            | 88.87                            | 23.00                                | 86.71                                | 0.06                             | 5.30                             | 0.06                                 | 5.52                                 | 22.40                                | 95.73                            | 11.41                                | 93.34                                | 0.06                                | 5.55                             | 0.06                                 | 5.74                                 |
| 85.90                            | 88.86                            | 24.18                                | 86.06                                | 0.06                             | 5.23                             | 0.06                                 | 5.57                                 | 22.78                                | 95.80                            | 13.25                                | 92.98                                | 0.06                                | 5.53                             | 0.06                                 | 5.67                                 |
| 91.82                            | 88.86                            | 26.12                                | 86.11                                | 0.06                             | 5.24                             | 0.06                                 | 5.53                                 | 22.78                                | 95.79                            | 12.82                                | 92.79                                | 0.06                                | 5.53                             | 0.06                                 | 5.77                                 |
| 92.80                            | 88.86                            | 26.05                                | 86.30                                | 0.06                             | 5.28                             | 0.06                                 | 5.56                                 | 22.87                                | 95.81                            | 9.65                                 | 90.57                                | 0.06                                | 5.46                             | 0.06                                 | 5.67                                 |
| 90.86                            | 88.86                            | 24.45                                | 86.46                                | 0.06                             | 5.25                             | 0.06                                 | 5.43                                 | 22.46                                | 95.78                            | 11.41                                | 92.68                                | 0.06                                | 5.53                             | 0.06                                 | 5.69                                 |
| 86.78                            | 88.83                            | 26.03                                | 86.30                                | 0.06                             | 5.27                             | 0.06                                 | 5.43                                 | 22.23                                | 95.70                            | 11.49                                | 91.99                                | 0.06                                | 5.55                             | 0.06                                 | 5.54                                 |
| 85.43                            | 88.83                            | 24.48                                | 86.08                                | 0.06                             | 5.26                             | 0.06                                 | 5.48                                 | 22.20                                | 95.71                            | 9.57                                 | 90.54                                | 0.06                                | 5.49                             | 0.06                                 | 5.67                                 |
| 83.71                            | 88.82                            | 25.36                                | 86.21                                | 0.06                             | 5.22                             | 0.06                                 | 5.52                                 | 22.50                                | 95.75                            | 12.57                                | 92.63                                | 0.06                                | 5.53                             | 0.06                                 | 5.55                                 |
| 92.91                            | 88.84                            | 23.75                                | 86.52                                | 0.06                             | 5.23                             | 0.06                                 | 5.44                                 | 22.35                                | 95.72                            | 11.83                                | 92.21                                | 0.06                                | 5.54                             | 0.06                                 | 5.63                                 |
| 85.67                            | 88.85                            | 23.27                                | 86.70                                | 0.06                             | 5.30                             | 0.06                                 | 5.46                                 | 22.16                                | 95.68                            | 11.53                                | 92.02                                | 0.06                                | 5.52                             | 0.06                                 | 5.55                                 |
| 89.61                            | 88.90                            | 23.97                                | 86.00                                | 0.06                             | 5.25                             | 0.06                                 | 5.38                                 | 22.52                                | 95.75                            | 12.32                                | 92.49                                | 0.06                                | 5.53                             | 0.06                                 | 5.60                                 |
| 89.90                            | 88.90                            | 26.49                                | 86.82                                | 0.06                             | 5.25                             | 0.06                                 | 5.35                                 | 22.82                                | 95.80                            | 10.62                                | 92.40                                | 0.06                                | 5.52                             | 0.06                                 | 5.78                                 |
| 90.49                            | 88.91                            | 25.30                                | 86.00                                | 0.05                             | 5.20                             | 0.06                                 | 5.48                                 | 22.40                                | 95.73                            | 11.99                                | 92.30                                | 0.06                                | 5.50                             | 0.06                                 | 5.66                                 |
| 86.44                            | 88.86                            | 24.54                                | 86.08                                | 0.06                             | 5.22                             | 0.06                                 | 5.55                                 | 22.69                                | 95.78                            | 12.34                                | 92.50                                | 0.06                                | 5.55                             | 0.06                                 | 5.66                                 |
| 87.03                            | 88.86                            | 22.90                                | 86.83                                | 0.06                             | 5.25                             | 0.06                                 | 5.53                                 | 21.98                                | 95.47                            | 9.26                                 | 90.33                                | 0.06                                | 5.55                             | 0.06                                 | 5.55                                 |
| 86.54                            | 88.86                            | 23.37                                | 86.56                                | 0.06                             | 5.22                             | 0.06                                 | 5.52                                 | 22.54                                | 95.80                            | 12.32                                | 92.49                                | 0.06                                | 5.55                             | 0.06                                 | 5.71                                 |
| 89.45                            | 88.89                            | 26.28                                | 86.33                                | 0.06                             | 5.24                             | 0.06                                 | 5.48                                 | 22.78                                | 95.79                            | 12.05                                | 92.34                                | 0.06                                | 5.57                             | 0.06                                 | 5.63                                 |
| 87.41                            | 88.87                            | 26.87                                | 86.41                                | 0.06                             | 5.29                             | 0.06                                 | 5.45                                 | 22.81                                | 95.80                            | 11.95                                | 92.28                                | 0.06                                | 5.49                             | 0.06                                 | 5.64                                 |
| 89.54                            | 88.90                            | 26.45                                | 86.36                                | 0.06                             | 5.29                             | 0.06                                 | 5.49                                 | 22.95                                | 95.82                            | 13.17                                | 92.04                                | 0.06                                | 5.55                             | 0.06                                 | 5.71                                 |
| 88.89                            | 88.89                            | 22.08                                | 86.48                                | 0.06                             | 5.28                             | 0.06                                 | 5.55                                 | 22.20                                | 95.69                            | 10.74                                | 92.15                                | 0.06                                | 5.43                             | 0.06                                 | 5.61                                 |
| 86.18                            | 88.85                            | 20.80                                | 86.41                                | 0.06                             | 5.25                             | 0.06                                 | 5.49                                 | 22.47                                | 95.74                            | 11.07                                | 91.72                                | 0.06                                | 5.49                             | 0.06                                 | 5.64                                 |
| 91.95                            | 88.82                            | 22.15                                | 86.68                                | 0.06                             | 5.25                             | 0.06                                 | 5.46                                 | 21.66                                | 95.60                            | 10.99                                | 91.66                                | 0.06                                | 5.48                             | 0.06                                 | 5.61                                 |
| 91.38                            | 88.82                            | 23.20                                | 86.87                                | 0.06                             | 5.29                             | 0.06                                 | 5.43                                 | 21.97                                | 95.65                            | 11.99                                | 92.30                                | 0.06                                | 5.52                             | 0.06                                 | 5.62                                 |
| 90.78                            | 88.91                            | 25.19                                | 86.21                                | 0.06                             | 5.30                             | 0.06                                 | 5.32                                 | 22.27                                | 95.81                            | 10.80                                | 91.58                                | 0.06                                | 5.47                             | 0.06                                 | 5.75                                 |
| 91.45                            | 88.94                            | 23.12                                | 86.42                                | 0.06                             | 5.26                             | 0.06                                 | 5.51                                 | 21.92                                | 95.64                            | 11.06                                | 91.81                                | 0.06                                | 5.50                             | 0.06                                 | 5.57                                 |
| 88.64                            | 88.92                            | 21.02                                | 86.46                                | 0.06                             | 5.33                             | 0.06                                 | 5.44                                 | 22.87                                | 95.81                            | 14.07                                | 92.06                                | 0.06                                | 5.56                             | 0.06                                 | 5.48                                 |
| 92.09                            | 88.94                            | 24.87                                | 86.82                                | 0.06                             | 5.27                             | 0.06                                 | 5.49                                 | 22.33                                | 95.79                            | 12.23                                | 92.79                                | 0.06                                | 5.49                             | 0.06                                 | 5.67                                 |
| 91.36                            | 88.92                            | 24.37                                | 86.06                                | 0.06                             | 5.25                             | 0.06                                 | 5.38                                 | 22.54                                | 95.75                            | 13.05                                | 92.88                                | 0.06                                | 5.51                             | 0.06                                 | 5.59                                 |
| 92.65                            | 88.88                            | 24.10                                | 86.00                                | 0.06                             | 5.26                             | 0.06                                 | 5.45                                 | 22.43                                | 95.78                            | 11.48                                | 92.63                                | 0.06                                | 5.55                             | 0.06                                 | 5.88                                 |
| 90.28                            | 88.90                            | 21.27                                | 86.51                                | 0.06                             | 5.26                             | 0.06                                 | 5.50                                 | 22.84                                | 95.81                            | 12.72                                | 92.71                                | 0.06                                | 5.54                             | 0.06                                 | 5.60                                 |
| 91.84                            | 88.93                            | 24.32                                | 86.05                                | 0.06                             | 5.30                             | 0.06                                 | 5.53                                 | 22.21                                | 95.69                            | 10.48                                | 91.29                                | 0.06                                | 5.53                             | 0.06                                 | 5.76                                 |
| 85.30                            | 88.84                            | 23.87                                | 86.40                                | 0.06                             | 5.30                             | 0.06                                 | 5.50                                 | 21.61                                | 95.77                            | 12.02                                | 92.32                                | 0.06                                | 5.50                             | 0.06                                 | 5.68                                 |
| 89.21                            | 88.89                            | 22.37                                | 86.72                                | 0.06                             | 5.25                             | 0.06                                 | 5.54                                 | 22.13                                | 95.68                            | 10.25                                | 92.45                                | 0.06                                | 5.49                             | 0.06                                 | 5.69                                 |
| 82.14                            | 88.87                            | 22.66                                | 86.77                                | 0.06                             | 5.27                             | 0.06                                 | 5.57                                 | 20.09                                | 95.66                            | 10.25                                | 92.45                                | 0.06                                | 5.50                             | 0.06                                 | 5.66                                 |
| 90.60                            | 88.91                            | 21.20                                | 86.49                                | 0.06                             | 5.28                             | 0.06                                 | 5.55                                 | 26.52                                | 96.37                            | 11.55                                | 91.78                                | 0.06                                | 5.50                             | 0.06                                 | 5.76                                 |
| 91.08                            | 88.85                            | 21.86                                | 86.84                                | 0.06                             | 5.23                             | 0.06                                 | 5.43                                 | 26.63                                | 96.39                            | 11.54                                | 91.54                                | 0.06                                | 5.53                             | 0.06                                 | 5.68                                 |
| 89.40                            | 88.90                            | 24.94                                | 86.14                                | 0.06                             | 5.28                             | 0.06                                 | 5.55                                 | 27.05                                | 96.43                            | 10.81                                | 91.54                                | 0.06                                | 5.48                             | 0.06                                 | 5.65                                 |
| 89.62                            | 88.93                            | 22.97                                | 86.48                                | 0.06                             | 5.28                             | 0.06                                 | 5.54                                 | 27.27                                | 96.46                            | 11.27                                | 91.46                                | 0.06                                | 5.49                             | 0.06                                 | 5.55                                 |
| 91.09                            | 88.87                            | 23.66                                | 86.74                                | 0.06                             | 5.27                             | 0.06                                 | 5.45                                 | 27.28                                | 96.46                            | 12.25                                | 92.45                                | 0.06                                | 5.55                             | 0.06                                 | 5.56                                 |
| 91.99                            | 88.91                            | 24.30                                | 86.05                                | 0.06                             | 5.30                             | 0.06                                 | 5.44                                 | 27.36                                | 96.47                            | 12.01                                | 92.12                                | 0.06                                | 5.50                             | 0.06                                 | 5.60                                 |
| 89.13                            | 88.84                            | 23.79                                | 86.79                                | 0.06                             | 5.36                             | 0.06                                 | 5.48                                 | 27.41                                | 96.48                            | 10.70                                | 91.51                                | 0.06                                | 5.57                             | 0.06                                 | 5.75                                 |
| 91.70                            | 88.91                            | 24.63                                | 86.10                                | 0.06                             | 5.28                             | 0.06                                 | 5.42                                 | 27.50                                | 96.49                            | 12.69                                | 92.69                                | 0.06                                | 5.54                             | 0.06                                 | 5.69                                 |
| 87.70                            | 88.87                            | 24.16                                | 86.04                                | 0.06                             | 5.24                             | 0.06                                 | 5.44                                 | 27.64                                | 96.51                            | 12.49                                | 92.51                                | 0.06                                | 5.49                             | 0.06                                 | 5.67                                 |
| 90.80                            | 88.91                            | 25.61                                | 86.24                                | 0.05                             | 5.21                             | 0.06                                 | 5.57                                 | 27.74                                | 96.52                            | 12.78                                | 92.74                                | 0.06                                | 5.48                             | 0.06                                 | 5.66                                 |
| 91.42                            | 88.91                            | 25.17                                | 86.17                                | 0.06                             | 5.22                             | 0.06                                 | 5.60                                 | 27.83                                | 96.53                            | 10.93                                | 91.59                                | 0.06                                | 5.50                             | 0.06                                 | 5.70                                 |
| 92.55                            | 88.93                            | 24.28                                | 86.04                                | 0.05                             | 5.17                             | 0.06                                 | 5.40                                 | 27.61                                | 96.38                            | 12.08                                | 92.35                                | 0.06                                | 5.48                             | 0.06                                 | 5.66                                 |
| 87.01                            | 88.87                            | 24.78                                | 86.49                                | 0.05                             | 5.21                             | 0.06                                 | 5.63                                 | 27.24                                | 96.40                            | 11.84                                | 92.21                                | 0.06                                | 5.57                             | 0.06                                 | 5.56                                 |
| 87.07                            | 88.85                            | 23.58                                | 86.76                                | 0.06                             | 5.31                             | 0.06                                 | 5.58                                 | 27.83                                | 96.53                            | 12.02                                | 92.81                                | 0.06                                | 5.53                             | 0.06                                 | 5.62                                 |
| 91.14                            | 88.91                            | 26.11                                | 86.11                                | 0.05                             | 5.22                             | 0.06                                 | 5.45                                 | 27.86                                | 96.53                            | 12.54                                | 92.61                                | 0.06                                | 5.49                             | 0.06                                 | 5.63                                 |
| 88.20                            | 88.87                            | 24.82                                | 86.13                                | 0.06                             | 5.31                             | 0.06                                 | 5.45                                 | 27.21                                | 96.45                            | 11.97                                | 91.82                                | 0.06                                | 5.54                             | 0.06                                 | 5.84                                 |
| 84.32                            | 88.83                            | 24.76                                | 86.12                                | 0.06                             | 5.29                             | 0.06                                 | 5.38                                 | 27.57                                | 96.50                            | 12.73                                | 92.72                                | 0.06                                | 5.48                             | 0.06                                 | 5.67                                 |
| 89.07                            | 88.88                            | 28.14                                | 86.58                                | 0.06                             | 5.26                             | 0.06                                 | 5.53                                 | 27.80                                | 96.53                            | 12.69                                | 92.47                                | 0.06                                | 5.50                             | 0.06                                 | 5.68                                 |
| 90.79                            | 88.91                            | 27.44                                | 86.48                                | 0.06                             | 5.31                             | 0.06                                 | 5.49                                 | 27.32                                | 96.47                            | 10.45                                | 91.26                                | 0.06                                | 5.54                             | 0.06                                 | 5.69                                 |
| 89.36                            | 88.85                            | 26.51                                | 86.42                                | 0.06                             | 5.20                             | 0.06                                 | 5.53                                 | 28.27                                | 96.55                            | 11.27                                | 91.41                                | 0.06                                | 5.49                             | 0.06                                 | 5.75                                 |
| 84.20                            | 88.83                            | 25.55                                | 86.23                                | 0.06                             | 5.27                             | 0.06                                 | 5.46                                 | 28.01                                | 96.55                            | 12.22                                | 92.97                                | 0.06                                | 5.48                             | 0.06                                 | 5.71                                 |
| 85.62                            | 88.85                            | 24.17                                | 86.03                                | 0.06                             | 5.26                             | 0.06                                 | 5.49                                 | 26.46                                | 96.36                            | 10.21                                | 91.08                                | 0.06                                | 5.49                             | 0.06                                 | 5.67                                 |
| 82.24                            | 88.80                            | 21.24                                | 86.87                                | 0.06                             | 5.30                             | 0.06                                 | 5.49                                 | 26.59                                | 96.38                            | 9.95                                 | 90.87                                | 0.06                                | 5.50                             | 0.06                                 | 5.60                                 |
| 89.02                            | 88.88                            | 25.41                                | 86.24                                | 0.06                             | 5.28                             | 0.06                                 | 5.42                                 | 26.89                                | 96.43                            | 9.95                                 | 90.65                                | 0.06                                | 5.56                             | 0.06                                 | 5.66                                 |
| 85.22                            | 88.84                            | 27.05                                | 86.44                                | 0.06                             | 5.27                             | 0.06                                 | 5.41                                 | 27.26                                | 96.52                            | 12.46                                | 92.52                                | 0.06                                | 5.52                             | 0.06                                 | 5.66                                 |
| 85.66                            | 88.85                            | 21.86                                | 86.63                                | 0.06                             | 5.27                             | 0.06                                 | 5.45                                 | 27.67                                | 96.51                            | 12.73                                | 92.71                                | 0.06                                | 5.52                             | 0.06                                 | 5.56                                 |
| 86.77                            | 88.86                            | 25.04                                | 86.16                                | 0.06                             | 5.23                             | 0.06                                 | 5.46                                 | 27.24                                | 96.46                            | 10.70                                | 91.46                                | 0.06                                | 5.58                             | 0.06                                 | 5.63                                 |
| 88.03                            | 88.88                            | 22.22                                | 86.69                                | 0.06                             | 5.27                             | 0.06                                 | 5.45                                 | 27.48                                | 96.51                            | 10.99                                | 91.59                                | 0.06                                | 5.49                             | 0.06                                 | 5.77                                 |
| 84.83                            | 88.81                            | 21.59                                | 86.71                                | 0.06                             | 5.25                             | 0.06                                 | 5.46                                 | 27.82                                | 96.53                            | 12.09                                | 92.85                                | 0.06                                | 5.51                             | 0.06                                 | 5.69                                 |
| 91.30                            | 88.92                            | 26.89                                | 86.43                                | 0.06                             | 5.30                             | 0.06                                 | 5.45                                 | 27.07                                | 96.44                            | 12.87                                | 92.79                                | 0.06                                | 5.50                             | 0.06                                 | 5.67                                 |
| 92.12                            | 88.93                            | 27.12                                | 86.52                                | 0.06                             | 5.28                             | 0.06                                 | 5.48                                 | 27.65                                | 96.53                            | 11.99                                | 91.49                                | 0.06                                | 5.53                             | 0.06                                 | 5.68                                 |
| 90.43                            | 88.91                            | 27.37                                | 86.48                                | 0.06                             | 5.31                             | 0.06                                 | 5.46                                 | 27.19                                | 96.45                            | 12.34                                | 92.50                                | 0.06                                | 5.56                             | 0.06                                 | 5.62                                 |
| 89.82                            | 88.92                            | 25.87                                | 86.30                                | 0.06                             | 5.23                             | 0.06                                 | 5.46                                 | 28.22                                | 96.53                            | 12.82                                | 92.36                                | 0.06                                | 5.48                             | 0.06                                 | 5.65                                 |
| 83.46                            | 88.82                            | 29.90                                | 86.76                                | 0.06                             | 5.22                             | 0.06                                 | 5.41                                 | 27.66                                | 96.51                            | 10.94                                | 91.63                                | 0.06                                | 5.51                             | 0.06                                 | 5.64                                 |
| 84.80                            | 88.82                            | 28.01                                | 86.55                                | 0.06                             | 5.23                             | 0.06                                 | 5.42                                 | 27.31                                | 96.47                            | 12.00                                | 92.10                                | 0.06                                | 5.53                             | 0.06                                 | 5.61                                 |
| 84.83                            | 88.83                            | 29.78                                | 86.76                                | 0.06                             | 5.26                             | 0.06                                 | 5.47                                 | 26.92                                | 96.37                            | 10.55                                | 90.49                                | 0.06                                | 5.50                             | 0.06                                 | 5.70                                 |
| 86.90                            | 88.79                            | 30.02                                | 86.78                                | 0.06                             | 5.28                             | 0.06                                 | 5.47                                 | 26.40                                | 96.37                            | 9.55                                 | 90.49                                | 0.06                                | 5.53                             | 0.06                                 | 5.61                                 |
| 83.21                            | 88.81                            |                                      |                                      |                                  |                                  |                                      |                                      |                                      |                                  |                                      |                                      |                                     |                                  |                                      |                                      |



|        |       |       |       |
|--------|-------|-------|-------|
| 74.81  | 88.68 | 24.34 | 95.05 |
| 75.00  | 88.70 | 24.05 | 95.66 |
| 75.15  | 88.72 | 24.35 | 95.05 |
| 75.50  | 88.69 | 24.13 | 95.09 |
| 75.87  | 88.70 | 24.05 | 95.61 |
| 77.81  | 88.73 | 23.05 | 95.84 |
| 78.71  | 88.71 | 24.45 | 95.87 |
| 72.81  | 88.65 | 24.93 | 95.14 |
| 74.99  | 88.68 | 25.00 | 95.15 |
| 78.62  | 88.74 | 23.66 | 95.94 |
| 77.53  | 88.73 | 24.54 | 95.09 |
| 77.77  | 88.73 | 24.03 | 95.00 |
| 76.29  | 88.74 | 23.22 | 95.87 |
| 75.12  | 88.69 | 22.32 | 95.71 |
| 76.62  | 88.75 | 24.10 | 95.02 |
| 75.96  | 88.70 | 23.11 | 95.67 |
| 74.71  | 88.68 | 23.52 | 95.92 |
| 71.76  | 88.63 | 24.74 | 95.12 |
| 76.90  | 88.72 | 23.69 | 95.95 |
| 63.77  | 88.55 | 23.08 | 95.69 |
| 56.79  | 88.27 | 14.77 | 93.86 |
| 65.71  | 88.50 | 20.76 | 95.40 |
| 66.06  | 88.53 | 21.30 | 95.42 |
| 63.22  | 88.53 | 21.74 | 95.60 |
| 65.87  | 88.50 | 20.78 | 95.41 |
| 66.59  | 88.52 | 21.74 | 95.60 |
| 65.19  | 88.44 | 21.19 | 95.49 |
| 64.87  | 88.48 | 22.26 | 95.70 |
| 66.53  | 88.52 | 20.99 | 95.45 |
| 65.04  | 88.49 | 20.59 | 95.37 |
| 64.06  | 88.46 | 22.41 | 95.73 |
| 64.66  | 88.48 | 20.48 | 95.34 |
| 65.75  | 88.50 | 20.64 | 95.38 |
| 63.35  | 88.39 | 19.14 | 95.04 |
| 59.80  | 88.36 | 19.93 | 95.22 |
| 64.57  | 88.47 | 20.17 | 95.38 |
| 64.33  | 88.47 | 20.35 | 95.32 |
| 67.77  | 88.56 | 22.43 | 95.73 |
| 64.68  | 88.48 | 21.66 | 95.59 |
| 65.86  | 88.50 | 21.75 | 95.60 |
| 65.53  | 88.50 | 21.50 | 95.74 |
| 66.25  | 88.51 | 21.37 | 95.53 |
| 66.49  | 88.57 | 20.17 | 95.28 |
| 65.58  | 88.50 | 21.54 | 95.56 |
| 64.62  | 88.48 | 20.21 | 95.29 |
| 65.52  | 88.50 | 22.30 | 95.71 |
| 64.70  | 88.48 | 21.07 | 95.47 |
| 64.66  | 88.50 | 21.37 | 95.53 |
| 68.18  | 88.55 | 21.03 | 95.46 |
| 63.13  | 88.53 | 18.26 | 94.81 |
| 65.57  | 88.50 | 20.49 | 95.35 |
| 65.10  | 88.49 | 20.75 | 95.40 |
| 65.91  | 88.51 | 21.43 | 95.54 |
| 66.62  | 88.52 | 21.63 | 95.58 |
| 65.98  | 88.51 | 20.45 | 95.34 |
| 63.47  | 88.45 | 20.63 | 95.38 |
| 66.02  | 88.51 | 21.69 | 95.59 |
| 65.41  | 88.45 | 20.78 | 95.43 |
| 63.19  | 88.39 | 19.45 | 95.34 |
| 65.83  | 88.50 | 21.59 | 95.57 |
| 66.54  | 88.52 | 21.48 | 95.55 |
| 68.16  | 88.55 | 22.17 | 95.68 |
| 66.01  | 88.51 | 21.85 | 95.65 |
| 66.46  | 88.52 | 21.52 | 95.56 |
| 66.86  | 88.53 | 21.75 | 95.60 |
| 64.66  | 88.48 | 21.40 | 95.54 |
| 66.18  | 88.51 | 21.43 | 95.54 |
| 63.63  | 88.45 | 21.12 | 95.52 |
| 65.90  | 88.51 | 17.98 | 94.73 |
| 65.32  | 88.49 | 20.87 | 95.48 |
| 75.38  | 88.76 | 23.09 | 95.85 |
| 76.16  | 88.70 | 24.28 | 95.04 |
| 76.52  | 88.71 | 23.17 | 95.93 |
| 77.24  | 88.72 | 22.05 | 95.66 |
| 74.62  | 88.68 | 23.43 | 95.91 |
| 76.16  | 88.70 | 23.00 | 95.83 |
| 78.10  | 88.74 | 24.22 | 95.09 |
| 76.29  | 88.71 | 22.60 | 95.76 |
| 70.17  | 88.69 | 23.17 | 95.86 |
| 75.18  | 88.65 | 22.28 | 95.60 |
| 76.82  | 88.71 | 23.12 | 95.85 |
| 74.87  | 88.68 | 23.42 | 95.90 |
| 73.77  | 88.66 | 22.50 | 95.74 |
| 74.65  | 88.68 | 22.78 | 95.79 |
| 75.81  | 88.70 | 22.84 | 95.81 |
| 77.13  | 88.72 | 23.04 | 95.84 |
| 74.08  | 88.70 | 23.22 | 95.87 |
| 75.74  | 88.70 | 22.11 | 95.71 |
| 78.81  | 88.75 | 23.12 | 95.85 |
| 76.97  | 88.72 | 23.59 | 95.93 |
| 77.40  | 88.72 | 24.32 | 95.05 |
| 76.54  | 88.71 | 23.72 | 95.96 |
| 77.11  | 88.72 | 23.58 | 95.83 |
| 76.79  | 88.71 | 24.03 | 95.00 |
| 77.05  | 88.73 | 23.64 | 95.94 |
| 75.35  | 88.69 | 22.92 | 95.82 |
| 76.12  | 88.70 | 22.49 | 95.74 |
| 78.97  | 88.75 | 23.24 | 95.88 |
| 76.21  | 88.70 | 23.99 | 95.65 |
| 76.26  | 88.71 | 23.99 | 95.83 |
| 78.94  | 88.75 | 23.92 | 95.99 |
| 77.95  | 88.73 | 23.52 | 95.92 |
| 78.74  | 88.75 | 23.65 | 95.94 |
| 78.85  | 88.76 | 23.09 | 95.85 |
| 76.49  | 88.75 | 23.22 | 95.87 |
| 75.27  | 88.69 | 22.78 | 95.79 |
| 78.89  | 88.75 | 24.39 | 95.96 |
| 79.31  | 88.75 | 23.25 | 95.88 |
| 77.50  | 88.73 | 23.63 | 95.94 |
| 77.99  | 88.73 | 23.80 | 95.97 |
| 76.45  | 88.74 | 22.63 | 95.77 |
| 73.83  | 88.64 | 23.60 | 95.93 |
| 78.00  | 88.73 | 23.60 | 95.94 |
| 74.28  | 88.67 | 22.58 | 95.76 |
| 78.15  | 88.74 | 24.19 | 95.09 |
| 77.38  | 88.72 | 23.11 | 95.85 |
| 77.52  | 88.73 | 22.88 | 95.81 |
| 77.02  | 88.72 | 23.44 | 95.95 |
| 75.79  | 88.70 | 22.61 | 95.76 |
| 75.55  | 88.69 | 22.95 | 95.82 |
| 77.98  | 88.73 | 24.05 | 95.61 |
| 69.10  | 88.57 | 21.14 | 95.48 |
| 75.69  | 88.70 | 23.15 | 95.86 |
| 75.88  | 88.70 | 23.59 | 95.93 |
| 76.40  | 88.71 | 22.41 | 95.73 |
| 74.45  | 88.67 | 23.31 | 95.89 |
| 76.17  | 88.67 | 23.49 | 95.92 |
| 72.51  | 88.64 | 24.12 | 95.02 |
| 77.00  | 88.72 | 23.86 | 95.63 |
| 77.14  | 88.72 | 23.62 | 95.94 |
| 74.05  | 88.67 | 22.42 | 95.73 |
| 74.30  | 88.67 | 22.71 | 95.78 |
| 76.48  | 88.71 | 23.17 | 95.90 |
| 123.43 | 99.27 | 24.88 | 95.34 |
| 118.97 | 99.17 | 26.23 | 95.33 |
| 118.64 | 99.17 | 26.17 | 95.32 |
| 121.33 | 99.18 | 26.03 | 95.30 |
| 121.43 | 99.18 | 25.63 | 95.25 |
| 120.77 | 99.18 | 25.63 | 95.16 |
| 121.12 | 99.18 | 25.13 | 95.17 |
| 120.74 | 99.18 | 25.11 | 95.17 |
| 117.97 | 99.16 | 22.30 | 95.73 |
| 118.34 | 99.16 | 22.84 | 95.81 |
| 120.47 | 99.18 | 26.31 | 95.34 |
| 120.38 | 99.18 | 25.85 | 95.28 |
| 118.83 | 99.16 | 22.72 | 95.78 |
| 117.22 | 99.15 | 21.14 | 95.48 |
| 119.88 | 99.17 | 25.00 | 95.15 |
| 120.41 | 99.18 | 23.56 | 95.93 |
| 121.34 | 99.18 | 23.54 | 95.92 |
| 119.45 | 99.17 | 23.86 | 95.98 |
| 120.71 | 99.18 | 24.12 | 95.02 |
| 119.35 | 99.17 | 25.31 | 95.20 |
| 120.50 | 99.18 | 24.57 | 95.09 |
| 119.07 | 99.17 | 23.95 | 95.99 |
| 120.12 | 99.17 | 23.79 | 95.97 |
| 119.16 | 99.17 | 23.91 | 95.99 |
| 119.10 | 99.17 | 23.60 | 95.94 |
| 117.74 | 99.16 | 25.12 | 95.17 |
| 121.45 | 99.18 | 26.64 | 95.38 |
| 120.34 | 99.18 | 23.34 | 95.89 |
| 119.72 | 99.17 | 23.38 | 95.90 |
| 120.13 | 99.17 | 23.88 | 95.98 |
| 120.50 | 99.18 | 25.58 | 95.24 |
| 120.24 | 99.18 | 24.60 | 95.09 |
| 117.34 | 99.16 | 25.78 | 95.27 |
| 120.50 | 99.18 | 25.65 | 95.25 |
| 121.44 | 99.18 | 26.21 | 95.32 |
| 120.85 | 99.18 | 27.61 | 95.11 |
| 120.89 | 99.18 | 24.04 | 95.03 |
| 121.46 | 99.18 | 23.61 | 95.94 |
| 119.17 | 99.17 | 23.62 | 95.58 |
| 118.43 | 99.16 | 23.20 | 95.69 |
| 117.81 | 99.16 | 21.36 | 95.53 |
| 117.72 | 99.16 | 21.90 | 95.98 |
| 118.76 | 99.16 | 23.47 | 95.91 |
| 120.10 | 99.17 | 24.61 | 95.30 |
| 118.62 | 99.16 | 23.17 | 95.86 |
| 119.19 | 99.17 | 26.44 | 95.36 |
| 119.57 | 99.17 | 23.67 | 95.95 |
| 117.88 | 99.16 | 20.76 | 95.40 |
| 121.30 | 99.18 | 25.17 | 95.19 |
| 104.26 | 99.05 | 25.50 | 95.23 |
| 76.54  | 98.34 | 23.17 | 95.73 |
| 144.94 | 99.31 | 23.06 | 95.84 |
| 65.14  | 88.49 | 15.65 | 93.99 |
| 66.03  | 88.55 | 17.20 | 94.51 |
| 64.89  | 88.48 | 14.64 | 93.61 |
| 68.17  | 88.55 | 17.11 | 94.54 |
| 65.48  | 88.50 | 16.25 | 94.20 |
| 66.63  | 88.52 | 16.71 | 94.35 |
| 67.10  | 88.53 | 17.38 | 94.56 |
| 63.15  | 88.39 | 16.83 | 94.39 |
| 66.84  | 88.51 | 17.08 | 94.47 |
| 66.42  | 88.52 | 16.55 | 94.30 |
| 67.02  | 88.53 | 15.86 | 94.07 |
| 66.69  | 88.52 | 15.54 | 93.95 |
| 67.05  | 88.53 | 16.88 | 94.41 |
| 65.65  | 88.50 | 14.97 | 93.74 |
| 67.80  | 88.55 | 17.40 | 94.56 |
| 67.43  | 88.54 | 17.17 | 94.50 |
| 67.50  | 88.54 | 17.45 | 94.58 |

S100\_4

S100\_5

B11\_1

|         |       |       |       |
|---------|-------|-------|-------|
| 68.14   | 98.55 | 17.62 | 94.63 |
| 68.20   | 98.53 | 16.31 | 94.22 |
| 68.08   | 98.55 | 16.97 | 94.43 |
| 68.00   | 98.57 | 17.87 | 94.70 |
| 67.92   | 98.55 | 17.68 | 94.65 |
| 67.74   | 98.54 | 17.61 | 94.63 |
| 67.37   | 98.54 | 16.76 | 94.37 |
| 68.03   | 98.55 | 18.20 | 94.79 |
| 67.34   | 98.54 | 17.62 | 94.63 |
| 67.80   | 98.55 | 17.03 | 94.45 |
| 66.60   | 98.52 | 16.17 | 94.18 |
| 66.63   | 98.52 | 16.19 | 94.18 |
| 67.27   | 98.54 | 17.02 | 94.46 |
| 65.89   | 98.50 | 16.43 | 94.26 |
| 67.14   | 98.53 | 16.04 | 94.13 |
| 66.78   | 98.52 | 17.12 | 94.48 |
| 68.35   | 98.56 | 16.48 | 94.28 |
| 66.93   | 98.53 | 16.78 | 94.38 |
| 67.44   | 98.54 | 15.97 | 94.11 |
| 65.98   | 98.51 | 16.60 | 94.32 |
| 66.87   | 98.53 | 16.33 | 94.23 |
| 66.76   | 98.52 | 16.24 | 94.20 |
| 66.27   | 98.51 | 17.15 | 94.49 |
| 65.46   | 98.50 | 16.30 | 94.22 |
| 63.05   | 98.54 | 17.59 | 94.62 |
| 66.71   | 98.52 | 17.14 | 94.49 |
| 67.64   | 98.54 | 16.75 | 94.37 |
| 66.37   | 98.52 | 16.33 | 94.23 |
| 68.93   | 98.57 | 17.72 | 94.66 |
| 67.61   | 98.54 | 17.50 | 94.59 |
| 66.79   | 98.50 | 15.97 | 94.11 |
| 65.99   | 98.51 | 16.12 | 94.16 |
| 67.26   | 98.53 | 15.85 | 94.06 |
| 62.90   | 98.55 | 17.82 | 94.69 |
| 68.21   | 98.56 | 17.89 | 94.71 |
| 68.92   | 98.51 | 17.60 | 94.62 |
| 67.23   | 98.53 | 16.61 | 94.32 |
| 65.88   | 98.50 | 16.04 | 94.13 |
| 67.31   | 98.54 | 17.53 | 94.60 |
| 66.88   | 98.53 | 16.32 | 94.23 |
| 64.14   | 98.46 | 15.16 | 93.81 |
| 67.05   | 98.53 | 16.56 | 94.31 |
| 66.76   | 98.52 | 16.09 | 94.15 |
| 66.51   | 98.52 | 17.27 | 94.53 |
| 67.56   | 98.54 | 15.95 | 94.18 |
| 66.75   | 98.52 | 15.86 | 94.07 |
| 66.61   | 98.52 | 16.51 | 94.29 |
| 64.98   | 98.48 | 15.00 | 93.75 |
| 66.48   | 98.52 | 17.54 | 94.61 |
| 63.17   | 98.53 | 16.02 | 94.12 |
| 66.12   | 98.51 | 16.26 | 94.21 |
| 67.44   | 98.54 | 16.93 | 94.42 |
| 66.39   | 98.52 | 16.99 | 94.44 |
| 66.40   | 98.52 | 16.18 | 94.18 |
| 63.77   | 98.46 | 14.96 | 93.73 |
| 74.47   | 98.68 | 20.00 | 95.24 |
| 70.50   | 98.60 | 17.81 | 94.69 |
| 69.10   | 98.57 | 19.52 | 95.13 |
| 70.56   | 98.60 | 19.56 | 95.14 |
| 70.84   | 98.61 | 20.82 | 95.42 |
| 70.64   | 98.60 | 18.68 | 94.92 |
| 71.17   | 98.61 | 20.67 | 95.38 |
| 72.80   | 98.65 | 19.71 | 95.17 |
| 71.02   | 98.61 | 20.31 | 95.31 |
| 72.04   | 98.63 | 20.03 | 95.25 |
| 71.81   | 98.63 | 20.93 | 95.44 |
| 70.87   | 98.61 | 20.52 | 95.35 |
| 72.07   | 98.63 | 20.18 | 95.28 |
| 71.29   | 98.62 | 18.66 | 94.91 |
| 70.24   | 98.60 | 20.52 | 95.35 |
| 72.36   | 98.64 | 19.09 | 95.00 |
| 70.61   | 98.60 | 20.21 | 95.29 |
| 71.61   | 98.62 | 19.99 | 95.24 |
| 70.56   | 98.60 | 18.40 | 94.85 |
| 70.74   | 98.61 | 20.61 | 95.37 |
| 71.41   | 98.62 | 17.68 | 94.65 |
| 70.89   | 98.61 | 20.03 | 95.24 |
| 71.80   | 98.63 | 21.00 | 95.45 |
| 68.49   | 98.58 | 18.07 | 94.76 |
| 71.12   | 98.61 | 17.02 | 94.45 |
| 70.59   | 98.60 | 20.75 | 95.40 |
| 68.32   | 98.58 | 18.48 | 94.87 |
| 71.39   | 98.62 | 19.24 | 95.06 |
| 70.15   | 98.59 | 19.20 | 95.05 |
| 70.41   | 98.60 | 19.29 | 95.07 |
| 72.44   | 98.64 | 19.61 | 95.15 |
| 70.22   | 98.60 | 18.36 | 94.84 |
| 68.89   | 98.59 | 20.90 | 95.43 |
| 69.77   | 98.59 | 18.09 | 94.76 |
| 69.63   | 98.58 | 18.99 | 95.00 |
| 72.36   | 98.63 | 20.83 | 95.42 |
| 71.79   | 98.61 | 17.56 | 94.61 |
| average | 98.56 | 17.51 | 95.31 |
| SD      | 0.51  |       | 1.37  |

BM 12

BM 13
