# Supplementary material for: Revisiting N2 fixation in Guerrero Negro intertidal microbial mats with a functional single-cell approach
Source: PubMed Central journal article supplement — ISME J. 2014 Oct 10;9(2):485–96. doi: 10.1038/ismej.2014.144 (PMC4303640; doi:10.1038/ismej.2014.144), 2014-10-10
Supplement: ismej2014144x15.pdf [file ismej2014144x15.pdf]

Supplementary Table 5: <sup>15</sup>N and <sup>13</sup>C enrichment values (depicted as isotope ratios and in at%) of *E. coli* and *B. subtilis* cells measured by NanoSIMS. Listed values are derived from fixed cells hybridized with the nonsense probe.

*E. coli* 99 at% - PFA fixed, CARD-FISH with nonsense probe

|         | <sup>15</sup> N/ <sup>14</sup> N | <sup>15</sup> N/( <sup>14</sup> N+ <sup>15</sup> N) [at%] | <sup>13</sup> C/ <sup>12</sup> C | <sup>13</sup> C/( <sup>12</sup> C+ <sup>13</sup> C) [at%] |
|---------|----------------------------------|-----------------------------------------------------------|----------------------------------|-----------------------------------------------------------|
| C8      | 4.51                             | 81.86                                                     | 2.92                             | 74.48                                                     |
|         | 4.63                             | 82.24                                                     | 2.98                             | 74.86                                                     |
|         | 5.00                             | 83.33                                                     | 3.12                             | 75.73                                                     |
|         | 4.34                             | 81.28                                                     | 3.02                             | 75.11                                                     |
|         | 5.06                             | 83.49                                                     | 3.16                             | 75.97                                                     |
|         | 4.34                             | 81.27                                                     | 2.90                             | 74.38                                                     |
|         | 4.76                             | 82.64                                                     | 3.13                             | 75.76                                                     |
|         | 4.72                             | 82.53                                                     | 3.07                             | 75.41                                                     |
|         | 4.32                             | 81.19                                                     | 2.98                             | 74.85                                                     |
|         | 3.92                             | 79.68                                                     | 2.80                             | 73.70                                                     |
|         | 3.86                             | 79.42                                                     | 2.62                             | 72.38                                                     |
|         | 4.36                             | 81.35                                                     | 2.97                             | 74.84                                                     |
|         | 3.83                             | 79.29                                                     | 2.70                             | 72.97                                                     |
| average |                                  | 81.50                                                     |                                  | 74.65                                                     |
| SD      |                                  | 1.39                                                      |                                  | 1.08                                                      |

*E. coli* 6 at% - PFA fixed, CARD-FISH with nonsense probe

|         | <sup>15</sup> N/ <sup>14</sup> N | <sup>15</sup> N/( <sup>14</sup> N+ <sup>15</sup> N) [at%] | <sup>13</sup> C/ <sup>12</sup> C | <sup>13</sup> C/( <sup>12</sup> C+ <sup>13</sup> C) [at%] |
|---------|----------------------------------|-----------------------------------------------------------|----------------------------------|-----------------------------------------------------------|
| G11     | 0.05                             | 4.78                                                      | 0.05                             | 4.68                                                      |
|         | 0.05                             | 4.73                                                      | 0.05                             | 4.66                                                      |
|         | 0.05                             | 4.78                                                      | 0.05                             | 4.66                                                      |
|         | 0.05                             | 4.84                                                      | 0.05                             | 4.56                                                      |
|         | 0.05                             | 4.84                                                      | 0.05                             | 4.62                                                      |
|         | 0.05                             | 4.75                                                      | 0.05                             | 4.57                                                      |
|         | 0.05                             | 4.78                                                      | 0.05                             | 4.58                                                      |
|         | 0.05                             | 4.76                                                      | 0.05                             | 4.65                                                      |
|         | 0.05                             | 4.68                                                      | 0.05                             | 4.60                                                      |
|         | 0.05                             | 4.89                                                      | 0.05                             | 4.66                                                      |
|         | 0.05                             | 4.74                                                      | 0.05                             | 4.57                                                      |
|         | 0.05                             | 4.75                                                      | 0.05                             | 4.55                                                      |
|         | 0.05                             | 4.80                                                      | 0.05                             | 4.68                                                      |
|         | 0.05                             | 4.96                                                      | 0.05                             | 4.93                                                      |
|         | 0.05                             | 4.93                                                      | 0.05                             | 4.78                                                      |
|         | 0.05                             | 4.81                                                      | 0.05                             | 4.67                                                      |
|         | 0.05                             | 4.84                                                      | 0.05                             | 4.67                                                      |
|         | 0.05                             | 4.88                                                      | 0.05                             | 4.73                                                      |
|         | 0.05                             | 4.69                                                      | 0.05                             | 4.36                                                      |
|         | 0.05                             | 4.76                                                      | 0.05                             | 4.59                                                      |
|         | 0.05                             | 4.79                                                      | 0.05                             | 4.71                                                      |
|         | 0.05                             | 4.82                                                      | 0.05                             | 4.68                                                      |
|         | 0.05                             | 4.89                                                      | 0.05                             | 4.65                                                      |
|         | 0.05                             | 4.75                                                      | 0.05                             | 4.50                                                      |
|         | 0.05                             | 4.84                                                      | 0.05                             | 4.51                                                      |
|         | 0.05                             | 4.86                                                      | 0.05                             | 4.68                                                      |
|         | 0.05                             | 4.81                                                      | 0.05                             | 4.58                                                      |
|         | 0.05                             | 4.76                                                      | 0.05                             | 4.53                                                      |
|         | 0.05                             | 4.89                                                      | 0.05                             | 4.72                                                      |
|         | 0.05                             | 4.85                                                      | 0.05                             | 4.68                                                      |
|         | 0.05                             | 4.80                                                      | 0.05                             | 4.66                                                      |
|         | 0.05                             | 4.84                                                      | 0.05                             | 4.52                                                      |
|         | 0.05                             | 4.81                                                      | 0.05                             | 4.58                                                      |
|         | 0.05                             | 4.87                                                      | 0.05                             | 4.44                                                      |
|         | 0.05                             | 4.75                                                      | 0.05                             | 4.58                                                      |
|         | 0.05                             | 4.72                                                      | 0.05                             | 4.55                                                      |
|         | 0.05                             | 4.73                                                      | 0.05                             | 4.60                                                      |
|         | 0.05                             | 4.70                                                      | 0.05                             | 4.48                                                      |
|         | 0.05                             | 4.79                                                      | 0.05                             | 4.69                                                      |
|         | 0.05                             | 4.81                                                      | 0.05                             | 4.71                                                      |
|         | 0.05                             | 4.70                                                      | 0.05                             | 4.73                                                      |
|         | 0.05                             | 4.77                                                      | 0.05                             | 4.68                                                      |
|         | 0.05                             | 4.77                                                      | 0.05                             | 4.51                                                      |
|         | 0.05                             | 4.72                                                      | 0.05                             | 4.73                                                      |
|         | 0.05                             | 4.75                                                      | 0.05                             | 4.65                                                      |
|         | 0.05                             | 4.74                                                      | 0.05                             | 4.66                                                      |
|         | 0.05                             | 4.85                                                      | 0.05                             | 4.67                                                      |
|         | 0.05                             | 4.70                                                      | 0.05                             | 4.39                                                      |
|         | 0.05                             | 4.78                                                      | 0.05                             | 4.63                                                      |
|         | 0.05                             | 4.83                                                      | 0.05                             | 4.59                                                      |
|         | 0.05                             | 4.71                                                      | 0.05                             | 4.34                                                      |
| average |                                  | 4.79                                                      |                                  | 4.62                                                      |
| SD      |                                  | 0.06                                                      |                                  | 0.11                                                      |

*B. subtilis* 99 at% - EtoH fixed, CARD-FISH with nonsense probe

|         | <sup>15</sup> N/ <sup>14</sup> N | <sup>15</sup> N/( <sup>14</sup> N+ <sup>15</sup> N) [at%] | <sup>13</sup> C/ <sup>12</sup> C | <sup>13</sup> C/( <sup>12</sup> C+ <sup>13</sup> C) [at%] |
|---------|----------------------------------|-----------------------------------------------------------|----------------------------------|-----------------------------------------------------------|
| B14     | 9.68                             | 90.63                                                     | 4.60                             | 82.13                                                     |
|         | 10.17                            | 91.05                                                     | 4.38                             | 81.43                                                     |
|         | 8.06                             | 88.96                                                     | 4.56                             | 82.01                                                     |
|         | 11.33                            | 91.89                                                     | 5.20                             | 83.87                                                     |
|         | 9.90                             | 90.82                                                     | 4.97                             | 83.24                                                     |
|         | 9.28                             | 90.27                                                     | 4.15                             | 80.58                                                     |
|         | 4.29                             | 81.11                                                     | 2.47                             | 71.15                                                     |
|         | 9.57                             | 90.54                                                     | 4.69                             | 82.42                                                     |
|         | 9.39                             | 90.37                                                     | 4.53                             | 81.91                                                     |
|         | 9.30                             | 90.29                                                     | 4.77                             | 82.68                                                     |
|         | 8.07                             | 88.98                                                     | 4.44                             | 81.61                                                     |
|         | 11.62                            | 92.08                                                     | 4.78                             | 82.68                                                     |
|         | 10.98                            | 91.66                                                     | 5.03                             | 83.41                                                     |
|         | 9.35                             | 90.34                                                     | 4.66                             | 82.34                                                     |
|         | 9.08                             | 90.08                                                     | 4.31                             | 81.16                                                     |
|         | 7.28                             | 87.93                                                     | 3.93                             | 79.70                                                     |
|         | 7.12                             | 87.69                                                     | 3.94                             | 79.75                                                     |
|         | 9.25                             | 90.24                                                     | 5.02                             | 83.38                                                     |
|         | 5.97                             | 85.66                                                     | 3.59                             | 78.22                                                     |
|         | 9.54                             | 90.51                                                     | 4.49                             | 81.79                                                     |
|         | 9.03                             | 90.03                                                     | 4.55                             | 81.98                                                     |
|         | 9.18                             | 90.17                                                     | 4.12                             | 80.45                                                     |
|         | 9.53                             | 90.50                                                     | 4.38                             | 81.42                                                     |
|         | 8.78                             | 89.78                                                     | 4.28                             | 81.07                                                     |
|         | 7.83                             | 88.68                                                     | 3.68                             | 78.65                                                     |
|         | 9.62                             | 90.58                                                     | 4.41                             | 81.53                                                     |
|         | 9.74                             | 90.69                                                     | 4.90                             | 82.47                                                     |
|         | 10.26                            | 91.12                                                     | 4.91                             | 83.09                                                     |
|         | 8.50                             | 89.47                                                     | 4.36                             | 81.33                                                     |
|         | 10.95                            | 91.63                                                     | 4.64                             | 82.28                                                     |
|         | 5.92                             | 85.55                                                     | 3.55                             | 78.01                                                     |
|         | 10.33                            | 91.17                                                     | 4.70                             | 82.47                                                     |
|         | 9.28                             | 90.27                                                     | 4.65                             | 82.31                                                     |
|         | 9.00                             | 90.00                                                     | 4.42                             | 81.55                                                     |
|         | 7.26                             | 87.89                                                     | 3.87                             | 79.49                                                     |
|         | 11.45                            | 91.97                                                     | 5.44                             | 84.47                                                     |
| average |                                  | 89.74                                                     |                                  | 81.33                                                     |
| SD      |                                  | 2.12                                                      |                                  | 2.30                                                      |

*B. subtilis* 6 at% - EtoH fixed, CARD-FISH with nonsense probe

|         | <sup>15</sup> N/ <sup>14</sup> N | <sup>15</sup> N/( <sup>14</sup> N+ <sup>15</sup> N) [at%] | <sup>13</sup> C/ <sup>12</sup> C | <sup>13</sup> C/( <sup>12</sup> C+ <sup>13</sup> C) [at%] |
|---------|----------------------------------|-----------------------------------------------------------|----------------------------------|-----------------------------------------------------------|
| E20     | 0.05                             | 4.88                                                      | 0.05                             | 4.87                                                      |
|         | 0.05                             | 4.70                                                      | 0.05                             | 4.84                                                      |
|         | 0.05                             | 4.78                                                      | 0.05                             | 4.75                                                      |
|         | 0.04                             | 4.04                                                      | 0.05                             | 4.66                                                      |
|         | 0.05                             | 4.65                                                      | 0.05                             | 4.69                                                      |
|         | 0.05                             | 4.47                                                      | 0.05                             | 4.53                                                      |
|         | 0.05                             | 4.58                                                      | 0.05                             | 4.75                                                      |
|         | 0.05                             | 4.62                                                      | 0.05                             | 4.73                                                      |
|         | 0.05                             | 4.65                                                      | 0.05                             | 4.76                                                      |
|         | 0.05                             | 4.64                                                      | 0.05                             | 4.62                                                      |
|         | 0.05                             | 4.60                                                      | 0.05                             | 4.56                                                      |
|         | 0.05                             | 4.64                                                      | 0.05                             | 4.62                                                      |
|         | 0.05                             | 4.53                                                      | 0.05                             | 4.59                                                      |
|         | 0.05                             | 4.69                                                      | 0.05                             | 4.59                                                      |
|         | 0.05                             | 4.52                                                      | 0.05                             | 4.59                                                      |
|         | 0.05                             | 4.82                                                      | 0.05                             | 4.91                                                      |
|         | 0.05                             | 4.56                                                      | 0.05                             | 4.70                                                      |
|         | 0.05                             | 4.76                                                      | 0.05                             | 4.85                                                      |
|         | 0.05                             | 4.59                                                      | 0.05                             | 4.77                                                      |
|         | 0.05                             | 4.76                                                      | 0.05                             | 4.86                                                      |
|         | 0.05                             | 4.64                                                      | 0.05                             | 4.71                                                      |
|         | 0.05                             | 4.57                                                      | 0.05                             | 4.59                                                      |
|         | 0.05                             | 4.71                                                      | 0.05                             | 4.79                                                      |
|         | 0.05                             | 4.70                                                      | 0.05                             | 4.88                                                      |
|         | 0.05                             | 4.54                                                      | 0.05                             | 4.66                                                      |
|         | 0.05                             | 4.82                                                      | 0.05                             | 4.82                                                      |
|         | 0.05                             | 4.61                                                      | 0.05                             | 4.62                                                      |
|         | 0.05                             | 4.59                                                      | 0.05                             | 4.73                                                      |
|         | 0.05                             | 4.50                                                      | 0.05                             | 4.61                                                      |
|         | 0.05                             | 4.48                                                      | 0.05                             | 4.47                                                      |
|         | 0.05                             | 4.68                                                      | 0.05                             | 4.69                                                      |
|         | 0.05                             | 4.62                                                      | 0.05                             | 4.59                                                      |
|         | 0.05                             | 4.91                                                      | 0.05                             | 4.93                                                      |
|         | 0.05                             | 4.49                                                      | 0.05                             | 4.48                                                      |
|         | 0.05                             | 4.69                                                      | 0.05                             | 4.86                                                      |
|         | 0.05                             | 4.69                                                      | 0.05                             | 4.70                                                      |
|         | 0.05                             | 4.77                                                      | 0.05                             | 5.04                                                      |
|         | 0.05                             | 4.52                                                      | 0.05                             | 4.57                                                      |
|         | 0.05                             | 4.59                                                      | 0.05                             | 4.77                                                      |
|         | 0.05                             | 4.67                                                      | 0.05                             | 4.73                                                      |
|         | 0.05                             | 4.57                                                      | 0.05                             | 4.52                                                      |
|         | 0.05                             | 4.63                                                      | 0.05                             | 4.65                                                      |
|         | 0.05                             | 4.48                                                      | 0.05                             | 4.73                                                      |
|         | 0.05                             | 4.64                                                      | 0.05                             | 4.77                                                      |
|         | 0.05                             | 4.59                                                      | 0.05                             | 4.55                                                      |
|         | 0.05                             | 4.62                                                      | 0.05                             | 4.58                                                      |
|         | 0.05                             | 4.62                                                      | 0.05                             | 4.69                                                      |
|         | 0.04                             | 4.17                                                      | 0.05                             | 4.81                                                      |
|         | 0.05                             | 4.66                                                      | 0.05                             | 4.77                                                      |
|         | 0.05                             | 4.73                                                      | 0.05                             | 4.89                                                      |
|         | 0.05                             | 4.60                                                      | 0.05                             | 4.62                                                      |
|         | 0.05                             | 4.62                                                      | 0.05                             | 4.65                                                      |
|         | 0.05                             | 4.64                                                      | 0.05                             | 4.68                                                      |
|         | 0.05                             | 4.59                                                      | 0.05                             | 4.61                                                      |
|         | 0.05                             | 4.55                                                      | 0.05                             | 4.69                                                      |
|         | 0.05                             | 4.58                                                      | 0.05                             | 4.75                                                      |
|         | 0.05                             | 4.62                                                      | 0.05                             | 4.65                                                      |
|         | 0.05                             | 4.74                                                      | 0.05                             | 4.84                                                      |
|         | 0.05                             | 4.71                                                      | 0.05                             | 4.84                                                      |
|         | 0.05                             | 4.37                                                      | 0.05                             | 4.60                                                      |
|         | 0.05                             | 4.74                                                      | 0.05                             | 4.86                                                      |
|         | 0.05                             | 4.60                                                      | 0.05                             | 4.64                                                      |
|         | 0.05                             | 4.85                                                      | 0.05                             | 4.84                                                      |
|         | 0.05                             | 4.48                                                      | 0.05                             | 4.62                                                      |
|         | 0.05                             | 4.58                                                      | 0.05                             | 4.74                                                      |
|         | 0.05                             | 4.64                                                      | 0.05                             | 4.74                                                      |
|         | 0.05                             | 4.66                                                      | 0.05                             | 4.76                                                      |
|         | 0.05                             | 4.52                                                      | 0.05                             | 4.57                                                      |
|         | 0.05                             | 4.65                                                      | 0.05                             | 4.66                                                      |
|         | 0.05                             | 4.47                                                      | 0.05                             | 4.54                                                      |
|         | 0.05                             | 4.59                                                      | 0.05                             | 4.57                                                      |
| average |                                  | 4.62                                                      |                                  | 4.70                                                      |
| SD      |                                  | 0.14                                                      |                                  | 0.12                                                      |
