# Supplementary material for: Revisiting N2 fixation in Guerrero Negro intertidal microbial mats with a functional single-cell approach
Source: PubMed Central journal article supplement — ISME J. 2014 Oct 10;9(2):485–96. doi: 10.1038/ismej.2014.144 (PMC4303640; doi:10.1038/ismej.2014.144), 2014-10-10
Supplement: ismej2014144x16.pdf [file ismej2014144x16.pdf]

Supplementary Table 6:  $^{15}\text{N}$  and  $^{13}\text{C}$  enrichment values (depicted as isotope ratios and in at%) of E. coli and B. subtilis cells measured by NanoSIMS. Listed values are derived from fixed cells hybridized with the EUB338 probe.

| Sample | E. coli 99 at% - PFA fixed, CARD-FISH with EUB338 probe |                               |      |                                                     | E. coli 6 at% - PFA fixed, CARD-FISH with EUB338 probe |                               |       |                                                     | B. subtilis 99 at% - EtOH fixed, CARD-FISH with EUB338 probe |                               |       |                                                     | B. subtilis 6 at% - EtOH fixed, CARD-FISH with EUB338 probe |                               |      |                                                     |
|--------|---------------------------------------------------------|-------------------------------|------|-----------------------------------------------------|--------------------------------------------------------|-------------------------------|-------|-----------------------------------------------------|--------------------------------------------------------------|-------------------------------|-------|-----------------------------------------------------|-------------------------------------------------------------|-------------------------------|------|-----------------------------------------------------|
|        | $^{15}\text{N}/^{14}\text{N}$                           | $^{13}\text{C}/^{12}\text{C}$ | at%  | ( $\delta^{15}\text{N}/\delta^{13}\text{C}$ ) [at%] | $^{15}\text{N}/^{14}\text{N}$                          | $^{13}\text{C}/^{12}\text{C}$ | at%   | ( $\delta^{15}\text{N}/\delta^{13}\text{C}$ ) [at%] | $^{15}\text{N}/^{14}\text{N}$                                | $^{13}\text{C}/^{12}\text{C}$ | at%   | ( $\delta^{15}\text{N}/\delta^{13}\text{C}$ ) [at%] | $^{15}\text{N}/^{14}\text{N}$                               | $^{13}\text{C}/^{12}\text{C}$ | at%  | ( $\delta^{15}\text{N}/\delta^{13}\text{C}$ ) [at%] |
| C3_1   | 2.81                                                    | 73.88                         | 1.71 | 63.07                                               | 0.05                                                   | 4.71                          | 0.04  | 4.31                                                | 2.17                                                         | 70.11                         | 1.08  | 52.01                                               | 0.04                                                        | 4.27                          | 0.05 | 4.36                                                |
|        | 2.12                                                    | 68.98                         | 1.42 | 58.41                                               | 0.05                                                   | 4.42                          | 0.04  | 3.98                                                | 1.42                                                         | 70.11                         | 1.46  | 59.30                                               | 0.05                                                        | 4.40                          | 0.05 | 4.49                                                |
|        | 2.16                                                    | 68.36                         | 1.31 | 56.80                                               | 0.05                                                   | 4.94                          | 0.05  | 4.73                                                | 2.10                                                         | 67.72                         | 1.19  | 54.41                                               | 0.05                                                        | 4.45                          | 0.05 | 4.56                                                |
|        | 2.16                                                    | 69.15                         | 1.45 | 60.10                                               | 0.05                                                   | 4.69                          | 0.05  | 4.47                                                | 2.10                                                         | 67.72                         | 1.19  | 54.41                                               | 0.05                                                        | 4.51                          | 0.05 | 4.59                                                |
|        | 2.66                                                    | 72.65                         | 1.61 | 61.74                                               | 0.05                                                   | 4.74                          | 0.05  | 4.36                                                | 2.10                                                         | 68.42                         | 1.07  | 51.77                                               | 0.05                                                        | 4.51                          | 0.05 | 4.61                                                |
|        | 2.13                                                    | 68.06                         | 1.29 | 56.30                                               | 0.05                                                   | 4.74                          | 0.05  | 4.42                                                | 2.48                                                         | 71.29                         | 0.97  | 49.16                                               | 0.05                                                        | 4.54                          | 0.05 | 4.73                                                |
|        | 2.10                                                    | 67.72                         | 1.25 | 55.61                                               | 0.05                                                   | 4.51                          | 0.04  | 4.16                                                | 2.48                                                         | 71.29                         | 0.97  | 49.16                                               | 0.05                                                        | 4.54                          | 0.05 | 4.57                                                |
|        | 2.65                                                    | 72.64                         | 1.60 | 61.52                                               | 0.05                                                   | 4.41                          | 0.04  | 4.30                                                | 2.13                                                         | 68.10                         | 0.83  | 45.46                                               | 0.05                                                        | 4.43                          | 0.05 | 4.59                                                |
|        | 2.09                                                    | 67.62                         | 1.30 | 56.58                                               | 0.05                                                   | 4.43                          | 0.04  | 4.26                                                | 2.17                                                         | 68.44                         | 1.10  | 52.41                                               | 0.05                                                        | 4.44                          | 0.05 | 4.46                                                |
|        | 2.12                                                    | 68.96                         | 1.48 | 58.15                                               | 0.04                                                   | 4.21                          | 0.04  | 3.99                                                | 2.10                                                         | 67.72                         | 1.19  | 54.41                                               | 0.05                                                        | 4.45                          | 0.05 | 4.52                                                |
|        | 2.39                                                    | 70.48                         | 1.49 | 59.86                                               | 0.05                                                   | 4.43                          | 0.04  | 4.15                                                | 2.08                                                         | 67.48                         | 1.21  | 54.81                                               | 0.05                                                        | 4.45                          | 0.05 | 4.58                                                |
|        | 2.44                                                    | 70.51                         | 1.51 | 60.18                                               | 0.05                                                   | 4.51                          | 0.04  | 4.06                                                | 2.07                                                         | 67.54                         | 1.32  | 55.63                                               | 0.05                                                        | 4.46                          | 0.05 | 4.57                                                |
|        | 2.41                                                    | 70.66                         | 1.48 | 59.67                                               | 0.05                                                   | 4.53                          | 0.04  | 4.23                                                | 2.65                                                         | 74.02                         | 1.24  | 55.36                                               | 0.05                                                        | 4.39                          | 0.05 | 4.38                                                |
|        | 2.63                                                    | 72.46                         | 1.56 | 60.95                                               | 0.05                                                   | 4.47                          | 0.04  | 4.20                                                | 2.07                                                         | 67.45                         | 1.34  | 57.20                                               | 0.05                                                        | 4.48                          | 0.05 | 4.58                                                |
|        | 2.82                                                    | 73.80                         | 1.74 | 63.46                                               | 0.05                                                   | 4.43                          | 0.04  | 4.01                                                | 1.99                                                         | 66.58                         | 1.35  | 57.53                                               | 0.05                                                        | 4.56                          | 0.05 | 4.65                                                |
|        | 2.90                                                    | 74.33                         | 1.82 | 64.48                                               | 0.05                                                   | 4.47                          | 0.04  | 4.30                                                | 4.21                                                         | 80.82                         | 2.07  | 67.43                                               | 0.05                                                        | 4.53                          | 0.05 | 4.61                                                |
|        | 2.15                                                    | 68.25                         | 1.33 | 57.07                                               | 0.05                                                   | 4.42                          | 0.04  | 3.98                                                | 3.61                                                         | 78.32                         | 1.68  | 62.74                                               | 0.04                                                        | 4.29                          | 0.04 | 4.25                                                |
|        | 2.00                                                    | 66.89                         | 1.24 | 55.30                                               | 0.05                                                   | 4.73                          | 0.05  | 4.65                                                | 2.76                                                         | 62.77                         | 0.76  | 43.55                                               | 0.05                                                        | 4.49                          | 0.05 | 4.70                                                |
|        | 2.32                                                    | 69.86                         | 1.45 | 59.23                                               | 0.05                                                   | 4.65                          | 0.05  | 4.49                                                | 3.26                                                         | 76.54                         | 1.43  | 58.90                                               | 0.05                                                        | 4.47                          | 0.05 | 4.62                                                |
|        | 1.99                                                    | 66.57                         | 1.18 | 54.21                                               | 0.05                                                   | 4.85                          | 0.04  | 4.24                                                | 1.64                                                         | 60.09                         | 1.19  | 54.80                                               | 0.05                                                        | 4.48                          | 0.05 | 4.58                                                |
|        | 2.47                                                    | 70.74                         | 1.47 | 59.48                                               | 0.05                                                   | 4.44                          | 0.04  | 4.13                                                | 2.00                                                         | 68.79                         | 1.72  | 63.17                                               | 0.05                                                        | 4.47                          | 0.05 | 4.56                                                |
|        | 2.61                                                    | 72.27                         | 1.61 | 61.71                                               | 0.05                                                   | 4.44                          | 0.05  | 4.39                                                | 2.64                                                         | 72.54                         | 1.74  | 63.52                                               | 0.05                                                        | 4.43                          | 0.05 | 4.45                                                |
|        | 2.05                                                    | 67.23                         | 1.27 | 55.89                                               | 0.05                                                   | 4.47                          | 0.04  | 4.01                                                | 2.92                                                         | 74.52                         | 1.42  | 58.63                                               | 0.05                                                        | 4.48                          | 0.05 | 4.45                                                |
|        | 2.03                                                    | 67.01                         | 1.30 | 56.48                                               | 0.05                                                   | 4.36                          | 0.04  | 4.08                                                | 2.55                                                         | 71.83                         | 1.05  | 51.23                                               | 0.05                                                        | 4.61                          | 0.05 | 4.70                                                |
|        | 2.35                                                    | 70.16                         | 1.41 | 58.48                                               | 0.05                                                   | 4.44                          | 0.04  | 4.29                                                | 2.94                                                         | 74.63                         | 1.50  | 59.93                                               | 0.05                                                        | 4.50                          | 0.05 | 4.75                                                |
|        | 2.40                                                    | 70.17                         | 1.52 | 60.17                                               | 0.05                                                   | 4.53                          | 0.04  | 4.17                                                | 2.80                                                         | 71.74                         | 1.74  | 63.55                                               | 0.05                                                        | 4.49                          | 0.05 | 4.54                                                |
|        | 2.45                                                    | 71.04                         | 1.49 | 59.83                                               | 0.04                                                   | 4.29                          | 0.04  | 3.98                                                | 1.67                                                         | 62.51                         | 1.22  | 54.87                                               | 0.05                                                        | 4.50                          | 0.05 | 4.57                                                |
|        | 2.30                                                    | 69.66                         | 1.46 | 59.31                                               | 0.05                                                   | 4.50                          | 0.04  | 3.89                                                | 2.03                                                         | 72.47                         | 1.75  | 63.59                                               | 0.05                                                        | 4.46                          | 0.05 | 4.52                                                |
|        | 2.51                                                    | 71.47                         | 1.55 | 60.81                                               | 0.05                                                   | 4.43                          | 0.05  | 4.05                                                | 2.70                                                         | 72.96                         | 1.68  | 62.74                                               | 0.04                                                        | 4.25                          | 0.04 | 4.44                                                |
|        | 2.27                                                    | 69.38                         | 1.45 | 59.10                                               | 0.05                                                   | 4.41                          | 0.04  | 4.22                                                | 2.69                                                         | 67.63                         | 1.01  | 50.13                                               | 0.04                                                        | 4.45                          | 0.05 | 4.66                                                |
|        | 2.13                                                    | 71.65                         | 1.51 | 60.16                                               | 0.05                                                   | 4.36                          | 0.04  | 4.19                                                | 2.88                                                         | 73.25                         | 2.67  | 71.29                                               | 0.04                                                        | 4.23                          | 0.04 | 4.50                                                |
|        | 2.23                                                    | 69.06                         | 1.48 | 59.68                                               | 0.05                                                   | 4.36                          | 0.04  | 4.09                                                | 3.60                                                         | 78.25                         | 1.13  | 53.15                                               | 0.05                                                        | 4.41                          | 0.05 | 4.34                                                |
|        | 2.40                                                    | 70.57                         | 1.49 | 59.85                                               | 0.05                                                   | 4.31                          | 0.04  | 4.08                                                | 3.26                                                         | 76.53                         | 1.32  | 56.98                                               | 0.04                                                        | 4.24                          | 0.05 | 4.40                                                |
|        | 2.47                                                    | 71.22                         | 1.58 | 61.48                                               | 0.05                                                   | 4.46                          | 0.05  | 4.35                                                | 3.60                                                         | 78.25                         | 1.13  | 53.15                                               | 0.05                                                        | 4.42                          | 0.05 | 4.71                                                |
|        | 1.89                                                    | 65.44                         | 1.38 | 57.90                                               | 0.05                                                   | 4.36                          | 0.04  | 4.07                                                | 2.52                                                         | 71.01                         | 0.97  | 49.16                                               | 0.05                                                        | 4.53                          | 0.05 | 4.57                                                |
|        | 2.11                                                    | 67.89                         | 1.47 | 62.54                                               | 0.05                                                   | 4.68                          | 0.04  | 4.22                                                | 2.71                                                         | 73.07                         | 1.02  | 52.56                                               | 0.05                                                        | 4.57                          | 0.05 | 4.71                                                |
|        | 2.23                                                    | 69.08                         | 1.48 | 60.03                                               | 0.05                                                   | 1.91                          | 65.58 | 2.93                                                | 74.52                                                        | 1.09                          | 52.08 | 0.05                                                | 4.42                                                        | 0.05                          | 4.61 |                                                     |
|        | 2.13                                                    | 68.01                         | 1.44 | 62.08                                               | 0.05                                                   | 3.48                          | 77.67 | 1.45                                                | 59.20                                                        | 0.05                          | 4.55  | 0.05                                                | 4.59                                                        | 0.05                          | 4.59 |                                                     |
|        | 1.96                                                    | 66.25                         | 1.57 | 61.07                                               | 0.05                                                   | 3.25                          | 81.35 | 1.65                                                | 62.31                                                        | 0.05                          | 4.48  | 0.05                                                | 4.49                                                        | 0.05                          | 4.58 |                                                     |
|        | 2.15                                                    | 68.28                         | 1.68 | 62.63                                               | 0.05                                                   | 8.25                          | 89.19 | 2.89                                                | 74.28                                                        | 0.05                          | 4.47  | 0.05                                                | 4.64                                                        | 0.05                          | 4.64 |                                                     |
|        | 1.56                                                    | 60.88                         | 1.18 | 54.19                                               | 0.05                                                   | 2.60                          | 72.20 | 1.43                                                | 58.79                                                        | 0.05                          | 4.41  | 0.05                                                | 4.60                                                        | 0.05                          | 4.62 |                                                     |
|        | 2.17                                                    | 68.41                         | 1.63 | 64.64                                               | 0.05                                                   | 4.18                          | 80.69 | 1.35                                                | 57.36                                                        | 0.05                          | 4.47  | 0.05                                                | 4.55                                                        | 0.05                          | 4.60 |                                                     |
|        | 2.27                                                    | 69.43                         | 2.00 | 66.63                                               | 0.05                                                   | 2.16                          | 69.50 | 1.37                                                | 57.86                                                        | 0.05                          | 4.44  | 0.05                                                | 4.54                                                        | 0.05                          | 4.54 |                                                     |
|        | 2.16                                                    | 68.40                         | 1.79 | 64.21                                               | 0.05                                                   | 3.43                          | 77.44 | 1.07                                                | 51.76                                                        | 0.05                          | 4.44  | 0.05                                                | 4.48                                                        | 0.05                          | 4.45 |                                                     |
|        | 1.70                                                    | 62.94                         | 1.27 | 55.97                                               | 0.05                                                   | 3.97                          | 79.87 | 1.19                                                | 54.33                                                        | 0.05                          | 4.44  | 0.05                                                | 4.53                                                        | 0.05                          | 4.53 |                                                     |
|        | 2.20                                                    | 68.75                         | 1.55 | 60.11                                               | 0.05                                                   | 3.19                          | 74.96 | 1.12                                                | 52.81                                                        | 0.05                          | 4.46  | 0.05                                                | 4.53                                                        | 0.05                          | 4.53 |                                                     |
|        | 1.63                                                    | 61.95                         | 1.29 | 56.17                                               | 0.05                                                   | 2.49                          | 71.33 | 0.85                                                | 45.93                                                        | 0.05                          | 4.46  | 0.05                                                | 4.55                                                        | 0.05                          | 4.55 |                                                     |
|        | 1.96                                                    | 66.24                         | 1.57 | 61.07                                               | 0.05                                                   | 2.96                          | 70.20 | 0.87                                                | 46.47                                                        | 0.05                          | 4.48  | 0.05                                                | 4.51                                                        | 0.05                          | 4.51 |                                                     |
|        | 1.64                                                    | 62.44                         | 1.48 | 58.17                                               | 0.05                                                   | 2.87                          | 74.81 | 0.84                                                | 45.72                                                        | 0.05                          | 4.42  | 0.05                                                | 4.46                                                        | 0.05                          | 4.46 |                                                     |
|        | 1.64                                                    | 62.44                         | 1.48 | 58.17                                               | 0.05                                                   | 2.96                          | 70.20 | 0.87                                                | 46.47                                                        | 0.05                          | 4.48  | 0.05                                                | 4.51                                                        | 0.05                          | 4.51 |                                                     |
|        | 2.28                                                    | 69.49                         | 1.57 | 60.11                                               | 0.05                                                   | 2.87                          | 74.81 | 0.84                                                | 45.72                                                        | 0.05                          | 4.42  | 0.05                                                | 4.46                                                        | 0.05                          | 4.46 |                                                     |
|        | 1.78                                                    | 64.02                         | 1.41 | 58.43                                               | 0.05                                                   | 2.87                          | 74.81 | 0.84                                                | 45.72                                                        | 0.05                          | 4.42  | 0.05                                                | 4.46                                                        | 0.05                          | 4.46 |                                                     |
|        | 1.97                                                    | 66.50                         | 1.64 | 60.69                                               | 0.05                                                   | 2.88                          | 74.26 | 1.00                                                | 50.26                                                        | 0.05                          | 4.47  | 0.05                                                | 4.47                                                        | 0.05                          | 4.47 |                                                     |
|        | 1.76                                                    | 63.76                         | 1.37 | 57.78                                               | 0.05                                                   | 2.37                          | 70.30 | 0.80                                                | 50.54                                                        | 0.05                          | 4.39  | 0.05                                                | 4.69                                                        | 0.05                          | 4.69 |                                                     |
|        | 2.03                                                    | 66.98                         | 1.72 | 63.20                                               | 0.05                                                   | 3.42                          | 77.40 | 1.21                                                | 54.79                                                        | 0.05                          | 4.48  | 0.05                                                | 4.69                                                        | 0.05                          | 4.69 |                                                     |
|        | 2.04                                                    | 67.17                         | 1.58 | 61.23                                               | 0.05                                                   | 2.14                          | 62.28 | 1.28                                                | 56.96                                                        | 0.05                          | 4.44  | 0.05                                                | 4.64                                                        | 0.05                          | 4.64 |                                                     |
|        | 2.20                                                    | 68.76                         | 1.78 | 64.01                                               | 0.05                                                   | 4.07                          | 80.28 | 1.54                                                | 60.70                                                        | 0.05                          | 4.49  | 0.05                                                | 4.76                                                        | 0.05                          | 4.76 |                                                     |
|        | 1.83                                                    | 64.72                         | 1.52 | 60.23                                               | 0.05                                                   | 3.37                          | 77.13 | 1.18                                                | 54.07                                                        | 0.04                          | 4.17  | 0.04                                                | 4.15                                                        | 0.04                          | 4.15 |                                                     |
|        | 1.98                                                    | 66.44                         | 1.43 | 58.84                                               | 0.05                                                   | 3.13                          | 75.79 | 1.27                                                | 55.92                                                        | 0.05                          | 4.49  | 0.05                                                | 4.55                                                        | 0.05                          | 4.55 |                                                     |
|        | 1.85                                                    | 64.97                         | 1.47 | 59.48                                               | 0.05                                                   | 3.13                          | 75.79 | 1.27                                                | 55.92                                                        | 0.04                          | 4.24  | 0.04                                                | 4.23                                                        | 0.04                          | 4.23 |                                                     |
|        | 1.73                                                    | 63.11                         | 1.31 | 56.16                                               | 0.05                                                   | 6.40                          | 86.49 | 2.47                                                | 71.17                                                        | 0.05                          | 4.21  | 0.05                                                | 4.25                                                        | 0.05                          | 4.25 |                                                     |
|        | 2.24                                                    | 69.11                         | 1.68 | 62.68                                               | 0.05                                                   | 2.61                          | 72.26 | 1.01                                                | 50.26                                                        | 0.05                          | 4.26  | 0.05                                                | 4.36                                                        | 0.05                          | 4.36 |                                                     |
|        | 2.31                                                    | 69.77                         | 1.84 | 64.79                                               | 0.05                                                   | 7.19                          | 81.19 | 4.60                                                | 89.60                                                        | 0.05                          | 4.47  | 0.05                                                | 4.53                                                        | 0.05                          | 4.53 |                                                     |
|        | 2.13                                                    | 68.02                         | 1.73 | 63.42                                               | 0.05                                                   | 2.70                          | 73.00 | 1.18                                                | 54.21                                                        | 0.05                          | 4.47  | 0.05                                                | 4.59                                                        | 0.05                          | 4.59 |                                                     |
|        | 2.00                                                    | 66.63                         | 1.63 | 61.98                                               | 0.05                                                   | 3.24                          | 76.41 | 1.22                                                | 54.91                                                        | 0.05                          | 4.50  | 0.05                                                | 4.55                                                        | 0.05                          | 4.55 |                                                     |
|        | 2.11                                                    | 67.83                         | 1.68 | 62.72                                               | 0.05                                                   | 2.56                          | 71.89 | 1.00                                                | 49.91                                                        | 0.05                          | 4.37  | 0.05                                                | 4.64                                                        | 0.05                          | 4.64 |                                                     |
|        | 1.96                                                    | 66.02                         | 1.60 | 62.00                                               | 0.05                                                   | 2.14                          | 62.28 | 1.28                                                | 56.96                                                        | 0.05                          | 4.44  | 0.05                                                | 4.70                                                        | 0.05                          | 4.70 |                                                     |
|        | 2.10                                                    | 67.76                         | 1.68 | 62.70                                               | 0.05                                                   | 3.24                          | 76.41 | 1.22                                                | 54.91                                                        | 0.05                          | 4.50  | 0.05                                                | 4.64                                                        | 0.05                          | 4.64 |                                                     |
|        | 2.03                                                    | 66.86                         | 1.54 | 60.68                                               | 0.05                                                   | 2.14                          | 62.28 | 1.28                                                | 56.96                                                        | 0.05                          | 4.44  | 0.05                                                | 4.70                                                        | 0.05                          | 4.70 |                                                     |
|        | 1.96                                                    | 66.24                         | 1.55 | 60.75                                               | 0.05                                                   | 3.00                          | 75.02 | 0.99                                                | 49.79                                                        | 0.05                          | 4.45  | 0.05                                                | 4.46                                                        | 0.05                          | 4.46 |                                                     |
|        | 2.33                                                    | 69.96                         | 1.90 | 65.47                                               | 0.05                                                   | 2.64                          | 72.52 | 0.90                                                | 47.30                                                        | 0.05                          | 4.63  | 0.05                                                | 4.74                                                        | 0.05                          | 4.74 |                                                     |
|        | 2.19                                                    | 68.69                         | 1.51 | 61.13                                               | 0.05                                                   | 3.40                          | 80.49 | 1.60                                                | 64.60                                                        | 0.05                          | 4.46  | 0.05                                                | 4.42                                                        | 0.05                          | 4.42 |                                                     |
|        | 2.04                                                    | 67.05                         | 1.56 | 60.94                                               | 0.05                                                   | 5.55                          | 84.73 | 1.77                                                | 63.84                                                        | 0.05                          | 4.39  | 0.05                                                | 4.50                                                        | 0.05                          | 4.50 |                                                     |
|        | 2.46                                                    | 71.08                         | 2.03 | 67.02                                               | 0.05                                                   | 2.51                          | 71.51 | 1.48                                                | 59.66                                                        | 0.05                          | 4.50  | 0.05                                                | 4.60                                                        | 0.05                          | 4.60 |                                                     |
|        | 2.25                                                    | 69.13                         | 1.96 | 66.27                                               | 0.05                                                   | 2.80                          | 73.65 | 1.45                                                | 59.15                                                        | 0.05                          | 4.46  | 0.05                                                | 4.60                                                        | 0.05                          | 4.60 |                                                     |
|        | 1.99                                                    | 66.55                         | 1.67 | 62.54                                               | 0.05                                                   | 6.74                          | 87.08 | 2.04                                                | 69.13                                                        | 0.05                          | 4.42  | 0.05                                                | 4.64                                                        | 0.05                          | 4.64 |                                                     |
|        | 2.20                                                    | 68.75                         | 1.84 | 64.75                                               | 0.05                                                   | 3.29                          | 76.38 | 1.05                                                | 51.33                                                        | 0.05                          | 4.39  | 0.05                                                | 4.74                                                        | 0.05                          | 4.74 |                                                     |
|        | 1.92                                                    | 65.41                         | 1.56 | 60.05                                               | 0.05                                                   | 3.19                          | 74.20 | 0.89                                                | 46.61                                                        | 0.05                          |       |                                                     |                                                             |                               |      |                                                     |

|         |       |      |       |
|---------|-------|------|-------|
| 1.30    | 76.72 | 1.98 | 66.44 |
| 1.59    | 78.20 | 2.31 | 69.76 |
| 1.62    | 78.36 | 2.23 | 69.02 |
| 1.24    | 76.39 | 2.06 | 67.28 |
| 1.21    | 76.25 | 1.99 | 66.50 |
| 1.15    | 75.90 | 1.97 | 66.35 |
| 1.32    | 76.86 | 2.03 | 67.03 |
| 1.39    | 77.23 | 2.17 | 68.48 |
| 1.97    | 74.83 | 1.83 | 64.60 |
| 1.11    | 76.80 | 2.05 | 67.27 |
| 1.14    | 75.86 | 1.95 | 66.12 |
| 1.29    | 76.69 | 1.97 | 66.29 |
| 1.25    | 76.49 | 2.00 | 66.72 |
| 1.93    | 79.74 | 2.42 | 70.78 |
| 1.35    | 77.00 | 2.27 | 69.38 |
| 1.81    | 79.20 | 2.21 | 68.88 |
| 1.84    | 73.96 | 1.80 | 64.23 |
| 1.92    | 79.69 | 2.75 | 73.37 |
| 1.81    | 79.21 | 2.46 | 71.08 |
| 1.77    | 79.04 | 2.35 | 70.16 |
| 1.63    | 78.42 | 2.24 | 69.16 |
| 1.38    | 77.16 | 2.11 | 67.89 |
| 1.70    | 72.98 | 1.63 | 62.03 |
| 1.27    | 76.60 | 2.18 | 68.55 |
| 1.77    | 73.49 | 1.67 | 62.61 |
| 1.76    | 78.99 | 2.48 | 71.29 |
| 1.00    | 75.00 | 1.80 | 64.32 |
| 1.85    | 74.04 | 1.69 | 62.85 |
| 1.83    | 73.92 | 1.83 | 64.71 |
| 1.53    | 77.91 | 2.01 | 66.76 |
| 1.30    | 76.74 | 2.29 | 69.58 |
| 1.41    | 77.31 | 2.10 | 67.70 |
| 1.78    | 73.55 | 1.59 | 61.38 |
| 1.06    | 75.36 | 1.96 | 66.21 |
| 1.40    | 77.29 | 2.22 | 68.90 |
| 1.26    | 76.54 | 2.08 | 67.52 |
| 1.88    | 74.24 | 1.79 | 64.15 |
| 1.19    | 76.11 | 1.89 | 65.45 |
| 1.89    | 74.32 | 1.97 | 66.33 |
| 1.64    | 78.45 | 2.48 | 71.35 |
| 1.93    | 79.72 | 2.41 | 72.29 |
| average | 70.84 |      | 62.54 |
| SD      | 5.31  |      | 4.04  |

|         |       |      |       |
|---------|-------|------|-------|
| 1.89    | 65.43 | 1.19 | 54.24 |
| 2.04    | 67.07 | 1.14 | 53.21 |
| 2.29    | 69.60 | 1.66 | 62.39 |
| 1.90    | 65.55 | 1.20 | 54.44 |
| 2.31    | 69.76 | 1.44 | 58.97 |
| 2.15    | 68.23 | 1.26 | 55.84 |
| 2.14    | 68.19 | 1.35 | 57.38 |
| 2.08    | 67.68 | 1.31 | 56.79 |
| 2.36    | 70.27 | 1.41 | 58.49 |
| 2.18    | 68.58 | 1.67 | 62.53 |
| 2.13    | 68.00 | 1.36 | 57.68 |
| 2.13    | 68.02 | 1.49 | 59.90 |
| 2.52    | 71.41 | 1.66 | 62.38 |
| 2.35    | 70.16 | 1.44 | 59.05 |
| 2.17    | 68.43 | 1.30 | 56.60 |
| 2.39    | 70.53 | 1.44 | 59.02 |
| 2.38    | 70.41 | 1.33 | 57.11 |
| 2.20    | 68.73 | 1.30 | 56.58 |
| 2.06    | 67.35 | 1.20 | 54.65 |
| 2.28    | 69.52 | 1.58 | 61.59 |
| 2.13    | 68.98 | 1.11 | 52.70 |
| 2.24    | 69.16 | 1.36 | 57.66 |
| 2.06    | 67.27 | 1.24 | 55.28 |
| 2.17    | 68.70 | 1.41 | 58.55 |
| 2.12    | 68.00 | 1.18 | 54.13 |
| 1.79    | 64.21 | 1.19 | 54.44 |
| 2.33    | 69.96 | 1.58 | 61.30 |
| 1.87    | 65.21 | 1.20 | 54.63 |
| 2.20    | 68.79 | 1.33 | 57.03 |
| 2.28    | 69.54 | 1.46 | 59.40 |
| 2.39    | 70.51 | 1.39 | 58.16 |
| average | 72.52 |      | 57.03 |
| SD      | 5.37  |      | 5.75  |

|         |      |      |      |
|---------|------|------|------|
| 0.04    | 4.06 | 0.04 | 3.95 |
| 0.04    | 4.06 | 0.04 | 4.19 |
| 0.04    | 4.15 | 0.04 | 4.13 |
| 0.05    | 4.43 | 0.05 | 4.63 |
| 0.05    | 4.43 | 0.05 | 4.59 |
| 0.05    | 4.42 | 0.05 | 4.51 |
| 0.04    | 4.30 | 0.05 | 4.43 |
| 0.05    | 4.31 | 0.05 | 4.34 |
| 0.04    | 4.08 | 0.04 | 4.04 |
| 0.04    | 4.15 | 0.04 | 4.21 |
| 0.04    | 4.25 | 0.04 | 4.12 |
| 0.04    | 4.07 | 0.04 | 4.05 |
| 0.04    | 4.20 | 0.04 | 4.20 |
| 0.05    | 4.35 | 0.05 | 4.44 |
| 0.05    | 4.60 | 0.05 | 4.51 |
| 0.05    | 4.49 | 0.05 | 4.46 |
| 0.04    | 4.19 | 0.04 | 4.10 |
| 0.04    | 4.16 | 0.04 | 4.00 |
| 0.04    | 4.01 | 0.04 | 4.08 |
| 0.04    | 4.07 | 0.04 | 3.95 |
| 0.05    | 4.31 | 0.05 | 4.42 |
| 0.04    | 4.13 | 0.04 | 4.32 |
| 0.05    | 4.31 | 0.05 | 4.29 |
| 0.04    | 4.13 | 0.04 | 4.08 |
| 0.04    | 4.16 | 0.04 | 4.10 |
| 0.04    | 4.28 | 0.04 | 4.20 |
| 0.04    | 4.16 | 0.04 | 4.32 |
| 0.04    | 4.14 | 0.04 | 4.20 |
| 0.05    | 3.95 | 0.05 | 4.00 |
| 0.04    | 4.12 | 0.04 | 4.25 |
| 0.05    | 4.43 | 0.05 | 4.54 |
| 0.04    | 4.19 | 0.04 | 4.26 |
| 0.04    | 4.15 | 0.05 | 4.42 |
| 0.04    | 4.29 | 0.05 | 4.31 |
| 0.04    | 4.18 | 0.04 | 4.02 |
| 0.04    | 4.26 | 0.05 | 4.62 |
| 0.05    | 4.59 | 0.05 | 4.71 |
| 0.05    | 4.33 | 0.05 | 4.47 |
| 0.05    | 4.37 | 0.05 | 4.52 |
| 0.05    | 4.37 | 0.05 | 4.46 |
| 0.04    | 4.15 | 0.04 | 4.29 |
| 0.04    | 4.05 | 0.04 | 4.18 |
| 0.04    | 4.23 | 0.04 | 4.19 |
| 0.04    | 4.16 | 0.04 | 4.15 |
| 0.04    | 4.22 | 0.05 | 4.48 |
| 0.04    | 3.98 | 0.04 | 3.96 |
| 0.04    | 4.12 | 0.04 | 4.09 |
| 0.04    | 4.09 | 0.04 | 4.05 |
| 0.05    | 4.31 | 0.04 | 4.19 |
| 0.04    | 4.10 | 0.05 | 4.32 |
| 0.04    | 4.24 | 0.05 | 4.38 |
| 0.04    | 4.29 | 0.05 | 4.39 |
| 0.04    | 4.26 | 0.04 | 4.28 |
| 0.05    | 4.34 | 0.04 | 4.22 |
| 0.04    | 4.23 | 0.05 | 4.37 |
| 0.04    | 3.96 | 0.04 | 4.14 |
| 0.04    | 4.01 | 0.04 | 3.93 |
| 0.04    | 4.05 | 0.04 | 4.00 |
| 0.05    | 4.39 | 0.05 | 4.48 |
| 0.05    | 4.43 | 0.05 | 4.51 |
| 0.05    | 4.31 | 0.04 | 4.30 |
| 0.04    | 4.07 | 0.04 | 4.21 |
| 0.04    | 4.10 | 0.04 | 4.24 |
| 0.05    | 4.41 | 0.05 | 4.53 |
| 0.04    | 4.20 | 0.04 | 4.36 |
| 0.04    | 3.89 | 0.04 | 3.82 |
| 0.04    | 3.99 | 0.04 | 3.83 |
| 0.04    | 3.95 | 0.04 | 3.86 |
| 0.04    | 3.93 | 0.04 | 4.15 |
| 0.05    | 4.31 | 0.04 | 4.24 |
| 0.04    | 4.15 | 0.04 | 4.30 |
| 0.05    | 4.31 | 0.05 | 4.39 |
| 0.04    | 3.99 | 0.04 | 3.95 |
| 0.04    | 4.09 | 0.04 | 3.99 |
| 0.04    | 4.23 | 0.05 | 4.33 |
| 0.04    | 4.04 | 0.04 | 3.94 |
| 0.04    | 4.19 | 0.04 | 4.22 |
| 0.05    | 4.45 | 0.05 | 4.47 |
| 0.05    | 4.48 | 0.05 | 4.46 |
| average | 4.33 |      | 4.41 |
| SD      | 0.16 |      | 0.21 |
