# Supplementary figures and images for: Revisiting N2 fixation in Guerrero Negro intertidal microbial mats with a functional single-cell approach
Source: PubMed Central journal article supplement — ISME J. 2014 Oct 10;9(2):485–96. doi: 10.1038/ismej.2014.144 (PMC4303640; doi:10.1038/ismej.2014.144), 2014-10-10

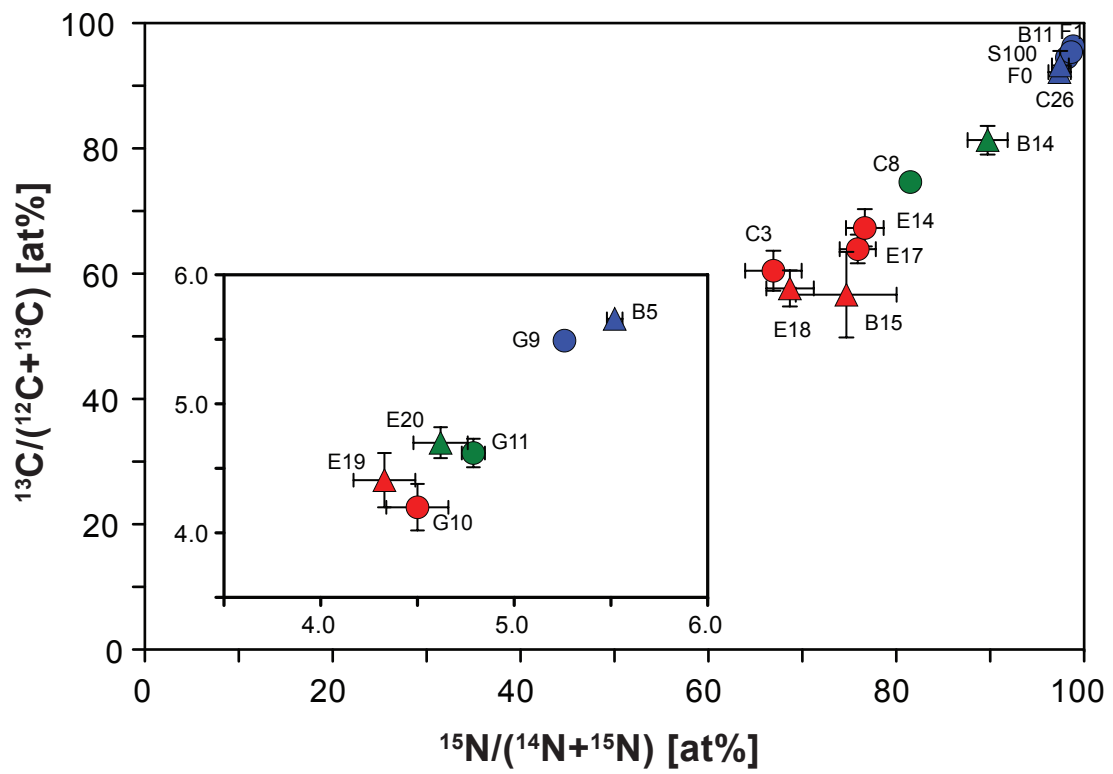

Supplementary Figure 8

Supplement: ismej2014144x10.pdf [file ismej2014144x10.pdf]

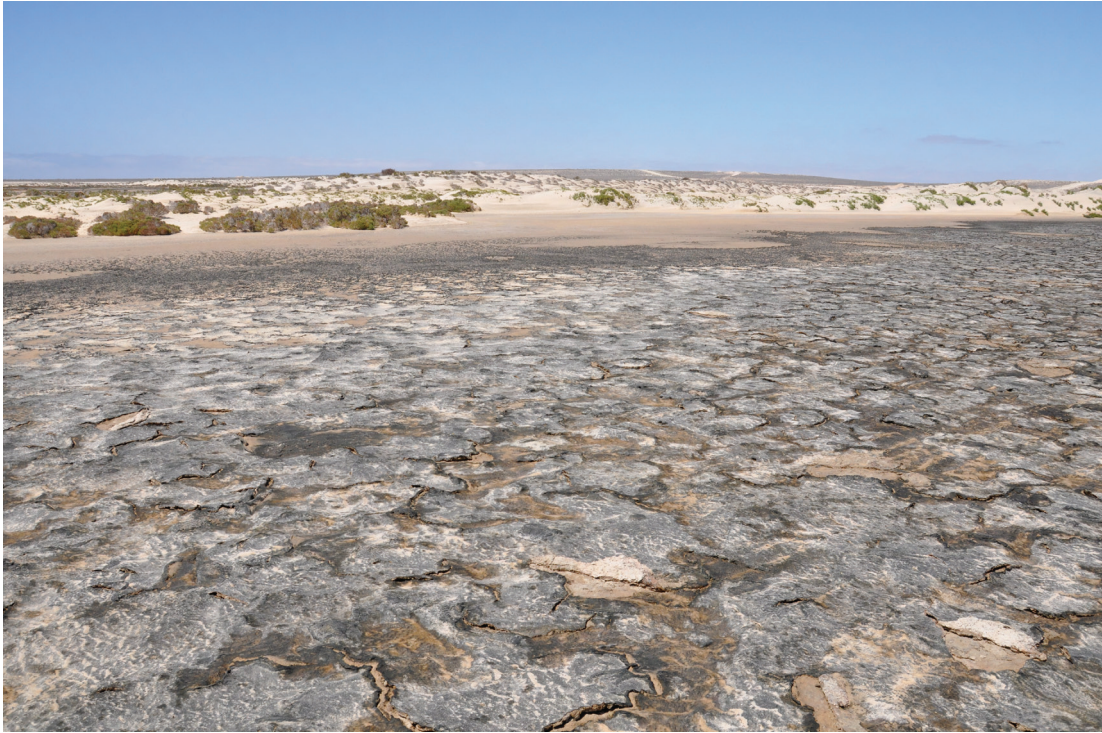

Supplementary Figure 1

Supplement: ismej2014144x3.pdf [file ismej2014144x3.pdf]

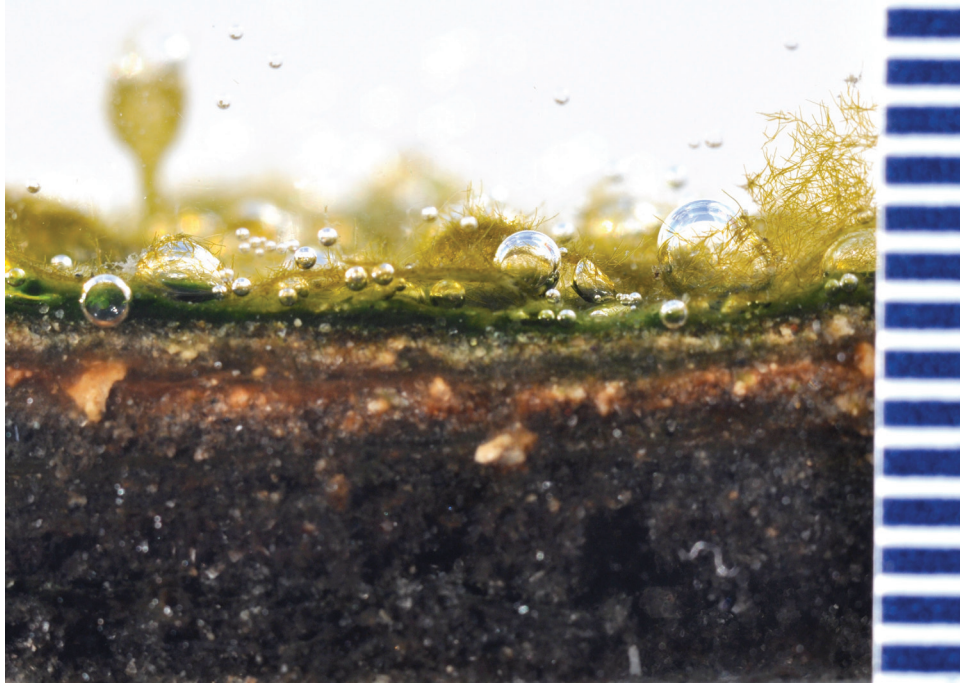

Supplementary Figure 2

Supplement: ismej2014144x4.pdf [file ismej2014144x4.pdf]

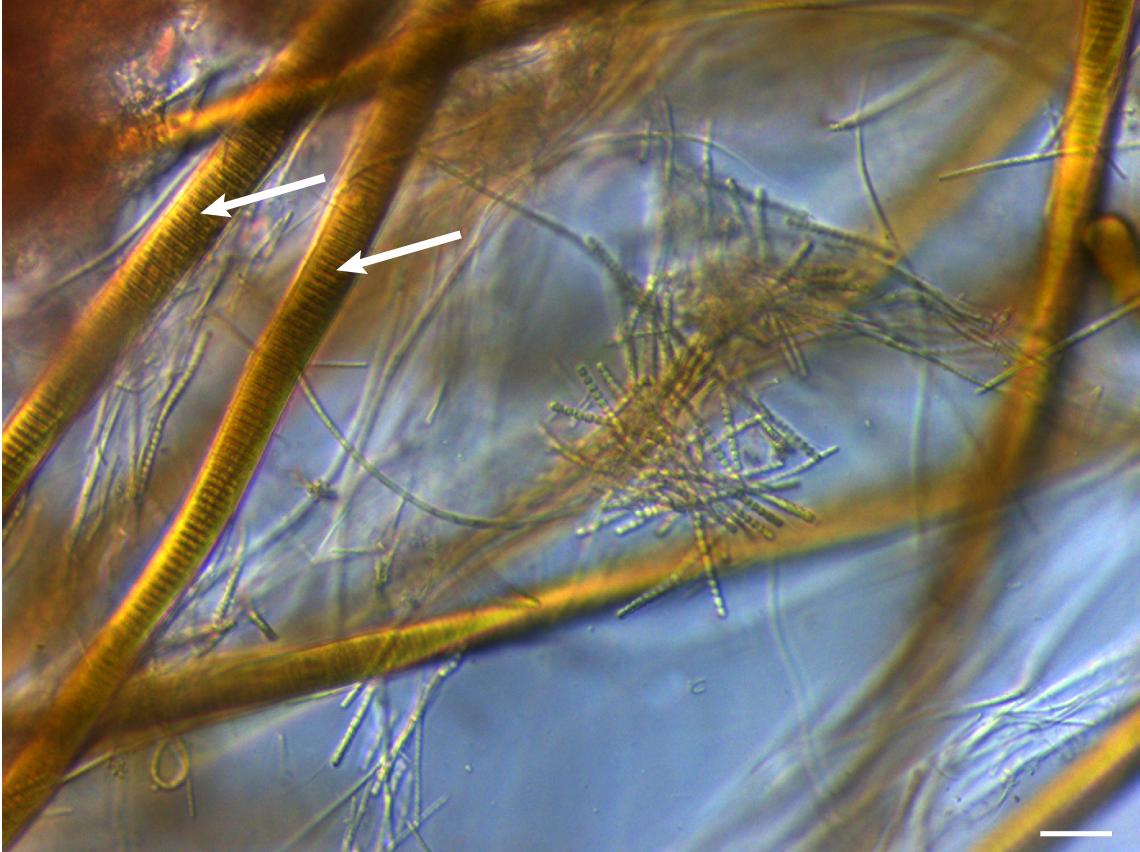

Supplementary Figure 3

Supplement: ismej2014144x5.pdf [file ismej2014144x5.pdf]

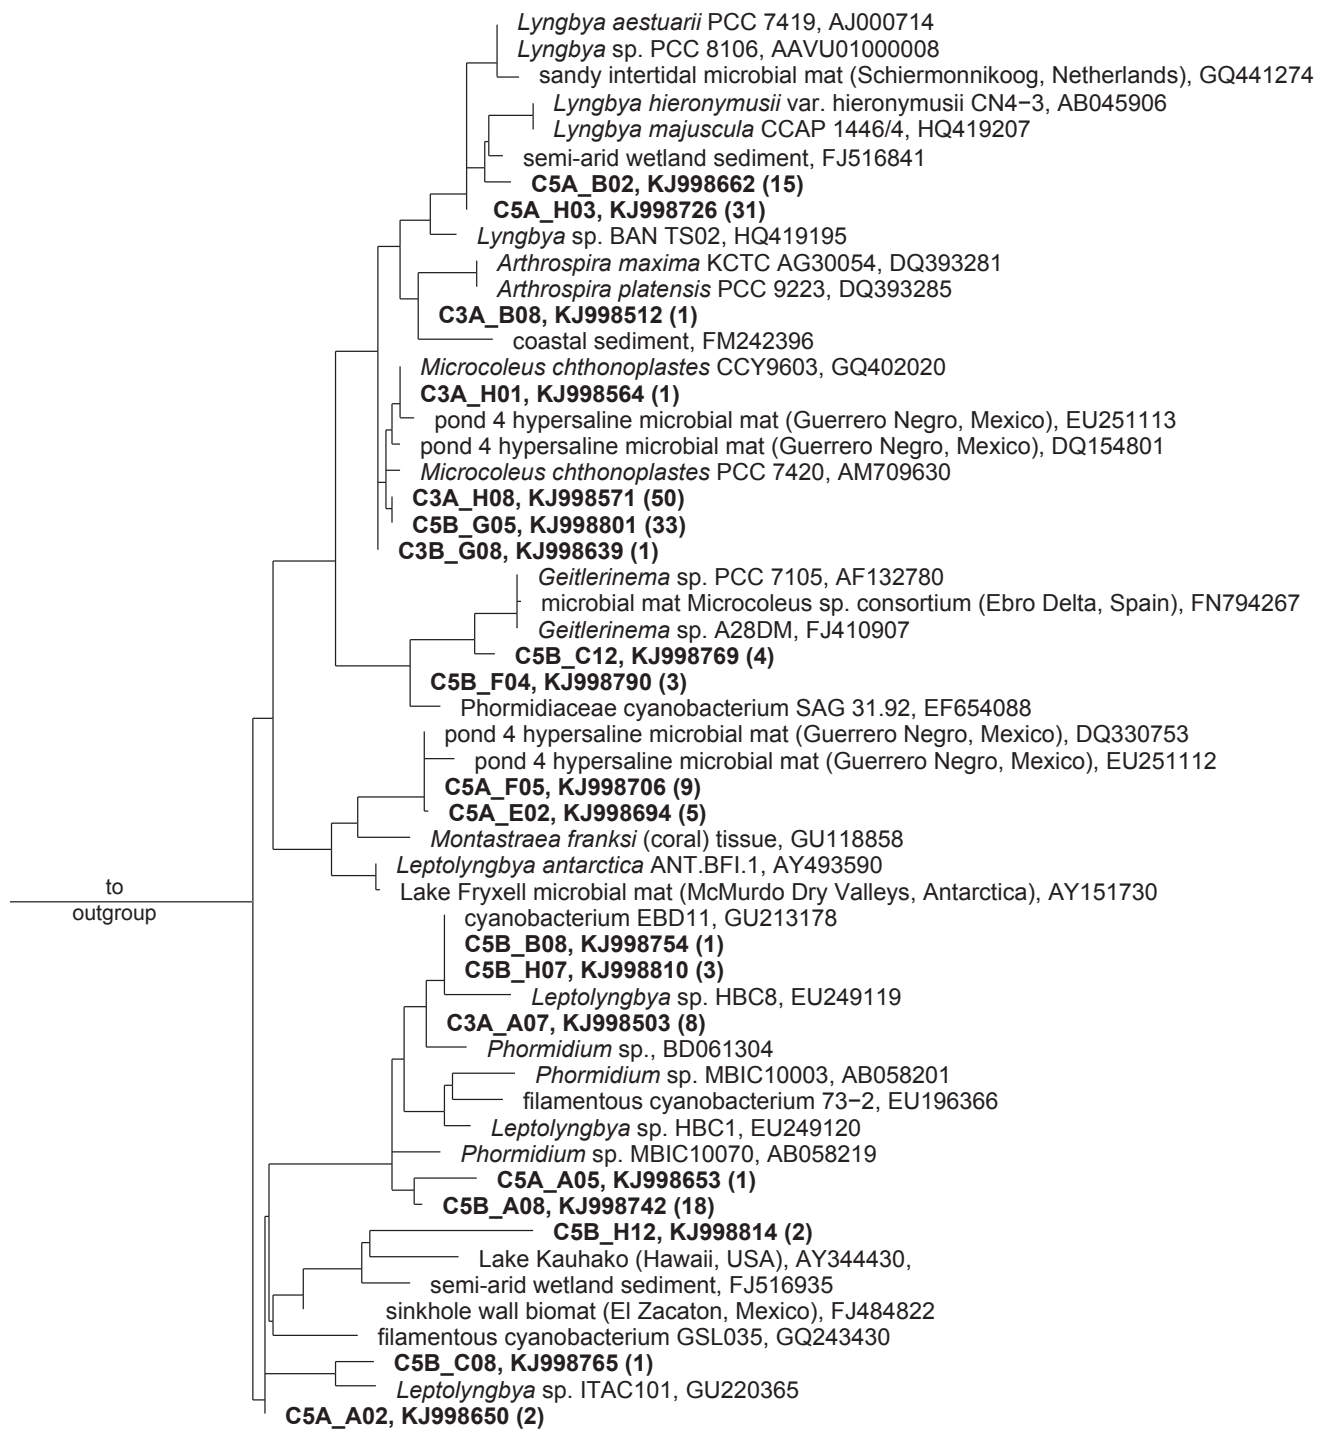

Supplementary Figure 4

Supplement: ismej2014144x6.pdf [file ismej2014144x6.pdf]

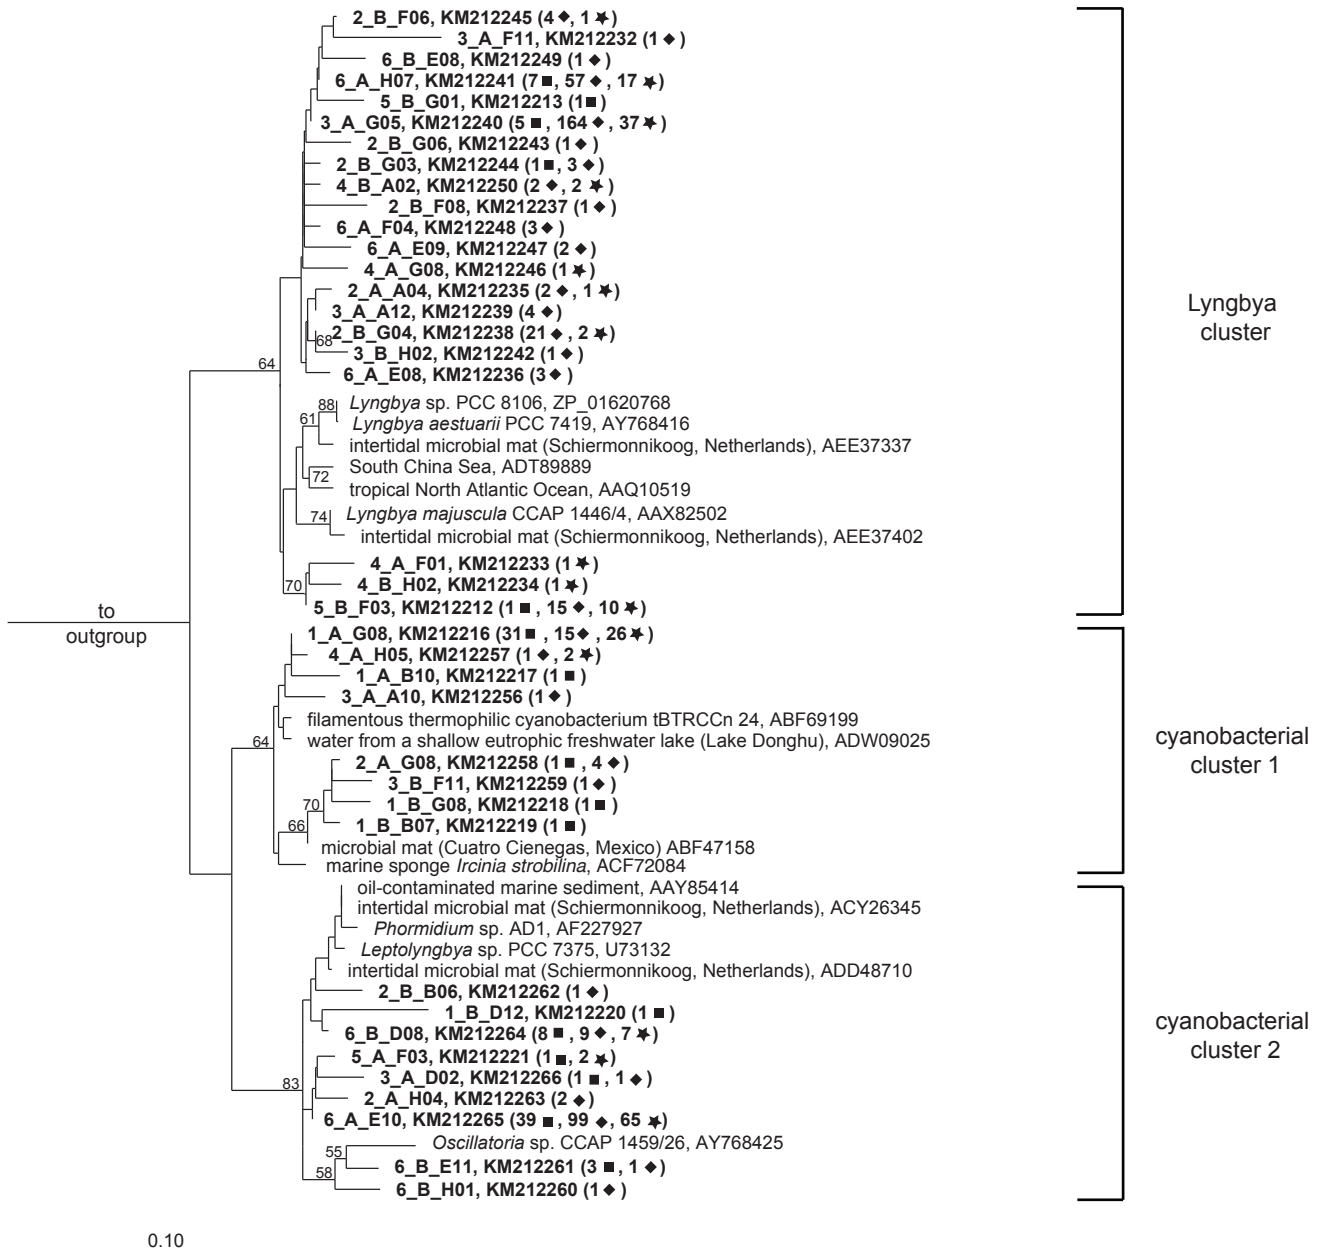

Supplementary Figure 5

Supplement: ismej2014144x7.pdf [file ismej2014144x7.pdf]

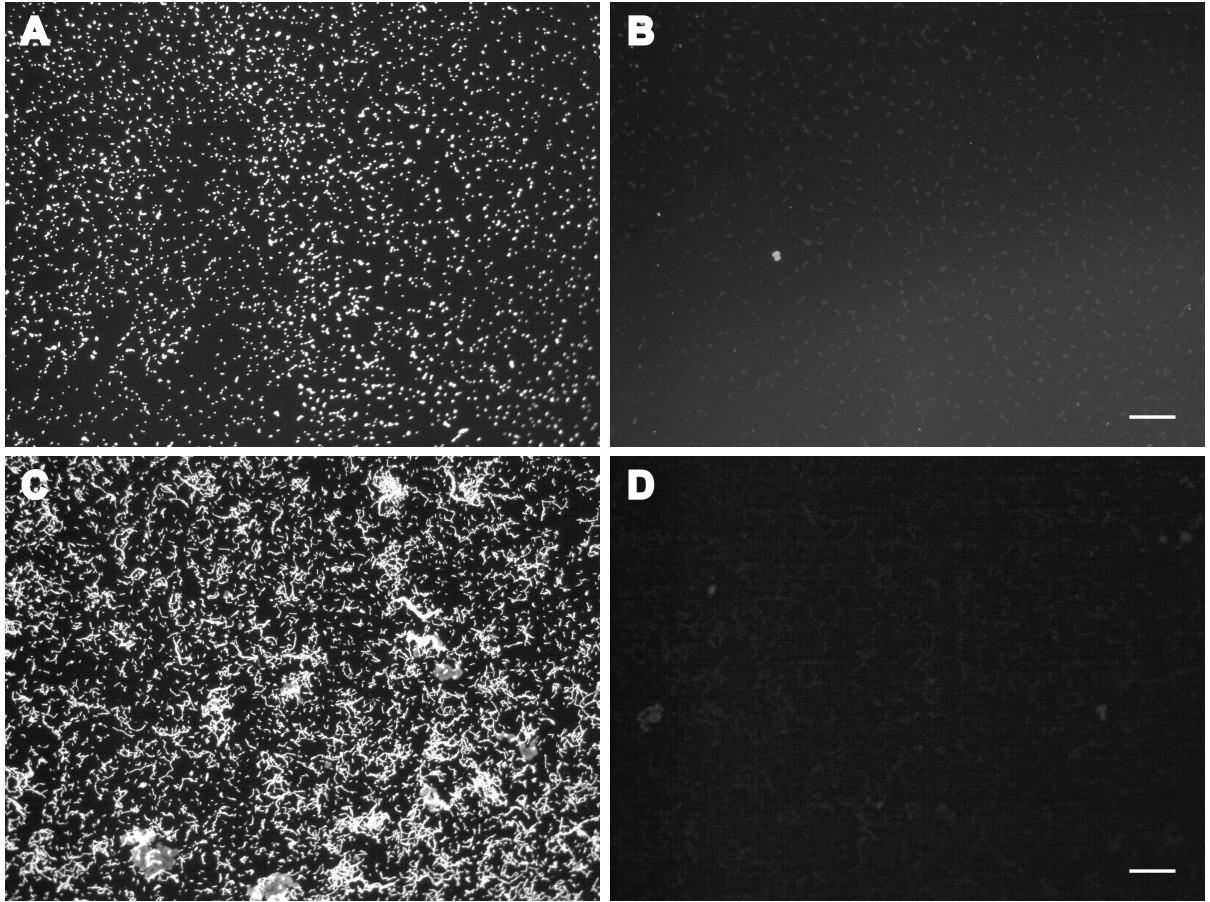

Supplementary Figure 6

Supplement: ismej2014144x8.pdf [file ismej2014144x8.pdf]

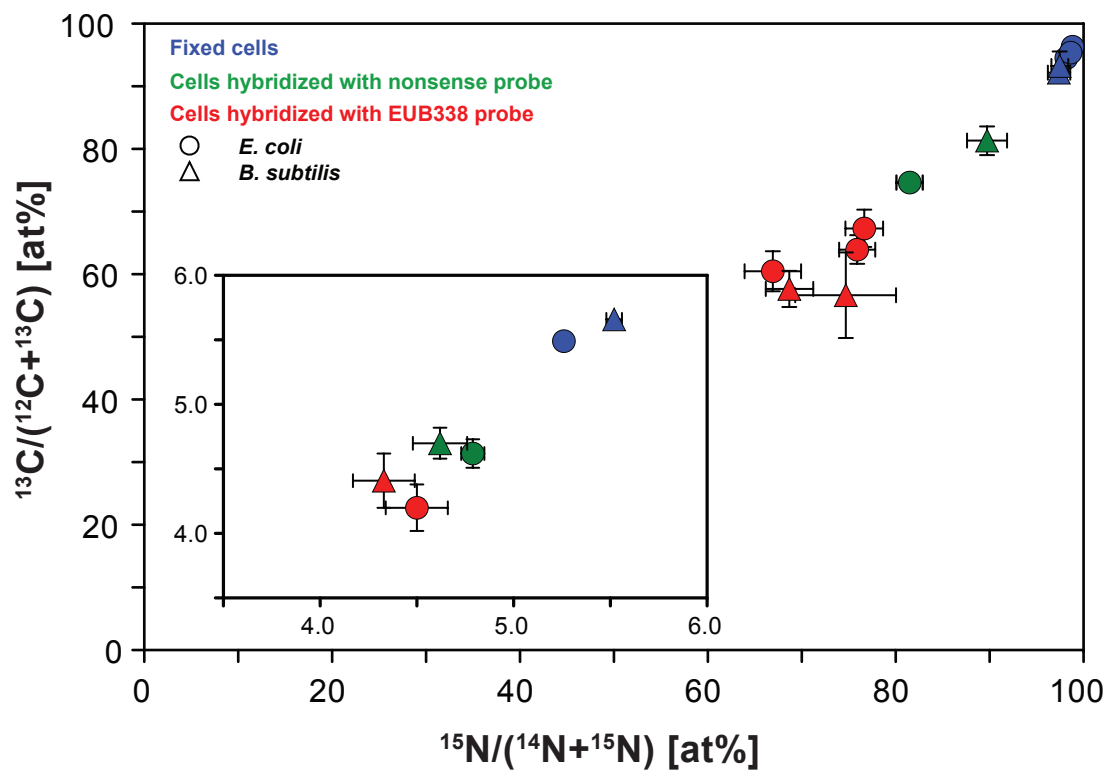

Supplementary Figure 7

Supplement: ismej2014144x9.pdf [file ismej2014144x9.pdf]
